# Supplementary material
Source: PubMed Central journal article supplement (PMC7652002)
Supplement: MD-011-D0MD00208A-s001.pdf [file MD-011-D0MD00208A-s001.pdf]

## SUPPLEMENTARY MATERIAL

### Synthesis and biological screening of a library of macamides as TNF- $\alpha$ inhibitors

Víctor Tena Pérez<sup>a</sup>, Luis Apaza Ticona<sup>a,b,\*</sup>, Andreea Madalina Serban<sup>c</sup>, Javier Acero Gómez<sup>a</sup>, Ángel Rumbero Sánchez<sup>a</sup>

#### Affiliation

<sup>a</sup>*Department of Organic Chemistry, Faculty of Sciences, University Autónoma of Madrid. Cantoblanco, 28049 Madrid, Spain*

<sup>b</sup>*Department of Pharmacology, Pharmacognosy and Botany, Faculty of Pharmacy, University Complutense of Madrid. Ciudad Universitaria s/n, 28040 Madrid, Spain*

<sup>c</sup>*Maria Sklodowska Curie University Hospital for Children. Constantin Brancoveanu Boulevard, 077120 Bucharest, Romania.*

#### \*Corresponding author

*E-mail addresses:* [luis.apaza@uam.es](mailto:luis.apaza@uam.es); [lnapaza@ucm.es](mailto:lnapaza@ucm.es) (Luis Apaza T.)

ORCID: 0000-0002-7135-3909

#### Contents:

- Figure 1S. <sup>1</sup>H NMR spectrum of *N*-benzylbutyramide (**1a**).
- Figure 2S. <sup>13</sup>C NMR spectrum of *N*-benzylbutyramide (**1a**).
- Figure 3S. <sup>1</sup>H NMR spectrum of *N*-benzyloctanamide (**1b**).
- Figure 4S. <sup>13</sup>C NMR spectrum of *N*-benzyloctanamide (**1b**).
- Figure 5S. <sup>1</sup>H NMR spectrum of *N*-benzylhexadecanamide (**1c**).
- Figure 6S. <sup>13</sup>C NMR spectrum of *N*-benzylhexadecanamide (**1c**).
- Figure 7S. <sup>1</sup>H NMR spectrum of *N*-benzyloctadecanamide (**1d**).
- Figure 8S. <sup>13</sup>C NMR spectrum of *N*-benzyloctadecanamide (**1d**).
- Figure 9S. <sup>1</sup>H NMR spectrum of (9*Z*)-*N*-benzyloctadec-9-enamide (**1e**).
- Figure 10S. <sup>13</sup>C NMR spectrum of (9*Z*)-*N*-benzyloctadec-9-enamide (**1e**).
- Figure 11S. <sup>1</sup>H NMR spectrum of (9*Z*,12*Z*)-*N*-benzyloctadeca-9,12-dienamide (**1f**).

- Figure 12S. <sup>13</sup>C NMR spectrum of (9Z,12Z)-*N*-benzyloctadeca-9,12-dienamide (**1f**).
- Figure 13S. <sup>1</sup>H NMR spectrum of (9Z,12Z)-*N*-phenyloctadeca-9,12-dienamide (**1g**).
- Figure 14S. <sup>13</sup>C NMR spectrum of (9Z,12Z)-*N*-phenyloctadeca-9,12-dienamide (**1g**).
- Figure 15S. <sup>1</sup>H NMR spectrum of (9Z,12Z)-*N*-phenethyloctadeca-9,12-dienamide (**1h**).
- Figure 16S. <sup>13</sup>C NMR spectrum of (9Z,12Z)-*N*-phenethyloctadeca-9,12-dienamide (**1h**).
- Figure 17S. <sup>1</sup>H NMR spectrum of (9Z,12Z)-*N*-(3-phenylpropyl)-octadeca-9,12-dienamide (**1i**).
- Figure 18S. <sup>13</sup>C NMR spectrum of (9Z,12Z)-*N*-(3-phenylpropyl)-octadeca-9,12-dienamide (**1i**).
- Figure 19S. <sup>1</sup>H NMR spectrum of (9Z,12Z)-*N'*-phenyloctadeca-9,12-dienehydrazide (**2a**).
- Figure 20S. <sup>13</sup>C NMR spectrum of (9Z,12Z)-*N'*-phenyloctadeca-9,12-dienehydrazide (**2a**).
- Figure 21S. <sup>1</sup>H NMR spectrum of (9Z,12Z)-*N*-(1-phenylethyl)-octadeca-9,12-dienamide (**2b**).
- Figure 22S. <sup>13</sup>C NMR spectrum of (9Z,12Z)-*N*-(1-phenylethyl)-octadeca-9,12-dienamide (**2b**).
- Figure 23S. <sup>1</sup>H NMR spectrum of (9Z,12Z)-*N*-(1-phenylpropyl)-octadeca-9,12-dienamide (**2c**).
- Figure 24S. <sup>13</sup>C NMR spectrum of (9Z,12Z)-*N*-(1-phenylpropyl)-octadeca-9,12-dienamide (**2c**).
- Figure 25S. <sup>1</sup>H NMR spectrum of (9Z,12Z)-*N*-(2-hydroxy-1-phenylethyl)-octadeca-9,12-dienamide (**2d**).
- Figure 26S. <sup>13</sup>C NMR spectrum of (9Z,12Z)-*N*-(2-hydroxy-1-phenylethyl)-octadeca-9,12-dienamide (**2d**).
- Figure 27S. <sup>1</sup>H NMR spectrum of (9Z,12Z)-*N*-(2-phenylpropan-2-yl)-octadeca-9,12-dienamide (**2e**).
- Figure 28S. <sup>13</sup>C NMR spectrum of (9Z,12Z)-*N*-(2-phenylpropan-2-yl)-octadeca-9,12-dienamide (**2e**).
- Figure 29S. <sup>1</sup>H NMR spectrum of (9Z,12Z)-*N*-benzyl-*N*-methyloctadeca-9,12-dienamide (**2f**).
- Figure 30S. <sup>13</sup>C NMR spectrum of (9Z,12Z)-*N*-benzyl-*N*-methyloctadeca-9,12-dienamide (**2f**).
- Figure 31S. <sup>1</sup>H NMR spectrum of (9Z,12Z)-1-(benzyloxy)-octadeca-9,12-dien-1-olate (**2g**).
- Figure 32S. <sup>13</sup>C NMR spectrum of (9Z,12Z)-1-(benzyloxy)-octadeca-9,12-dien-1-olate (**2g**).
- Figure 33S. <sup>1</sup>H NMR spectrum of (9Z,12Z)-1-(benzylthio)-octadeca-9,12-dien-1-olate (**2h**).
- Figure 34S. <sup>13</sup>C NMR spectrum of (9Z,12Z)-1-(benzylthio)-octadeca-9,12-dien-1-olate (**2h**).
- Figure 35S. <sup>1</sup>H NMR spectrum of (9Z,12Z)-*N*-(1-phenylethyl)-octadeca-9,12-dien-1-amine (**2i**).
- Figure 36S. <sup>13</sup>C NMR spectrum of (9Z,12Z)-*N*-(1-phenylethyl)-octadeca-9,12-dien-1-amine (**2i**).
- Figure 37S. <sup>1</sup>H NMR spectrum of (9Z,12Z)-*N*-(1-phenylethyl)-octadeca-9,12-dienothiamide (**2j**).
- Figure 38S. <sup>13</sup>C NMR spectrum of (9Z,12Z)-*N*-(1-phenylethyl)-octadeca-9,12-dienothiamide (**2j**).
- Figure 39S. <sup>1</sup>H NMR spectrum of (9Z,12Z)-*N*-(1-cyclohexylethyl)-octadeca-9,12-dienamide (**3a**).
- Figure 40S. <sup>13</sup>C NMR spectrum of (9Z,12Z)-*N*-(1-cyclohexylethyl)-octadeca-9,12-dienamide (**3a**).
- Figure 41S. <sup>1</sup>H NMR spectrum of (9Z,12Z)-*N*-(3,3-dimethylbutan-2-yl)-octadeca-9,12-dienamide (**3b**).
- Figure 42S. <sup>13</sup>C NMR spectrum of (9Z,12Z)-*N*-(3,3-dimethylbutan-2-yl)-octadeca-9,12-dienamide (**3b**).
- Figure 43S. <sup>1</sup>H NMR spectrum of (9Z,12Z)-*N*-(1-((3r,5r,7r)-adamantan-1-yl)-ethyl)-octadeca-9,12-dienamide (**3c**).
- Figure 44S. <sup>13</sup>C NMR spectrum of (9Z,12Z)-*N*-(1-((3r,5r,7r)-adamantan-1-yl)-ethyl)-octadeca-9,12-dienamide (**3c**).
- Figure 45S. <sup>1</sup>H NMR spectrum of (9Z,12Z)-*N*-(1-(4-hydroxyphenyl)-ethyl)-octadeca-9,12-dienamide (**3d**).
- Figure 46S. <sup>13</sup>C NMR spectrum of (9Z,12Z)-*N*-(1-(4-hydroxyphenyl)-ethyl)-octadeca-9,12-dienamide (**3d**).
- Figure 47S. <sup>1</sup>H NMR spectrum of (9Z,12Z)-*N*-(1-(4-methoxyphenyl)-ethyl)-octadeca-9,12-dienamide (**3e**).
- Figure 48S. <sup>13</sup>C NMR spectrum of (9Z,12Z)-*N*-(1-(4-methoxyphenyl)-ethyl)-octadeca-9,12-dienamide (**3e**).
- Figure 49S. <sup>1</sup>H NMR spectrum of (9Z,12Z)-*N*-(1-(*p*-tolyl)-ethyl)-octadeca-9,12-dienamide (**3f**).
- Figure 50S. <sup>13</sup>C NMR spectrum of (9Z,12Z)-*N*-(1-(*p*-tolyl)-ethyl)-octadeca-9,12-dienamide (**3f**).
- Figure 51S. <sup>1</sup>H NMR spectrum of (9Z,12Z)-*N*-(1-(4-(trifluoromethyl)-phenyl)-ethyl)-octadeca-9,12-dienamide (**3g**).
- Figure 52S. <sup>13</sup>C NMR spectrum of (9Z,12Z)-*N*-(1-(4-(trifluoromethyl)-phenyl)-ethyl)-octadeca-9,12-dienamide (**3g**).
- Figure 53S. <sup>1</sup>H NMR spectrum of (9Z,12Z)-*N*-(1-(4-fluorophenyl)-ethyl)-octadeca-9,12-dienamide (**3h**).
- Figure 54S. <sup>13</sup>C NMR spectrum of (9Z,12Z)-*N*-(1-(4-fluorophenyl)-ethyl)-octadeca-9,12-dienamide (**3h**).

- Figure 55S. <sup>1</sup>H NMR spectrum of (9Z,12Z)-N-(1-(4-bromophenyl)-ethyl)-octadeca-9,12-dienamide (**3i**).
- Figure 56S. <sup>13</sup>C NMR spectrum of (9Z,12Z)-N-(1-(4-bromophenyl)-ethyl)-octadeca-9,12-dienamide (**3i**).
- Figure 57S. <sup>1</sup>H NMR spectrum of (9Z,12Z)-N-(1-(4-ethylphenyl)-ethyl)-octadeca-9,12-dienamide (**3j**).
- Figure 58S. <sup>13</sup>C NMR spectrum of (9Z,12Z)-N-(1-(4-ethylphenyl)-ethyl)-octadeca-9,12-dienamide (**3j**).
- Figure 59S. <sup>1</sup>H NMR spectrum of (9Z,12Z)-N-(1-(*o*-tolyl)-ethyl)-octadeca-9,12-dienamide (**3k**).
- Figure 60S. <sup>13</sup>C NMR spectrum of (9Z,12Z)-N-(1-(*o*-tolyl)-ethyl)-octadeca-9,12-dienamide (**3k**).
- Figure 61S. <sup>1</sup>H NMR spectrum of (9Z,12Z)-N-(1-(*m*-tolyl)-ethyl)-octadeca-9,12-dienamide (**3l**).
- Figure 62S. <sup>13</sup>C NMR spectrum of (9Z,12Z)-N-(1-(*m*-tolyl)-ethyl)-octadeca-9,12-dienamide (**3l**).
- Figure 63S. <sup>1</sup>H NMR spectrum of (9Z,12Z)-N-(1-(3,5-dimethylphenyl)-ethyl)-octadeca-9,12-dienamide (**3m**).
- Figure 64S. <sup>13</sup>C NMR spectrum of (9Z,12Z)-N-(1-(3,5-dimethylphenyl)-ethyl)-octadeca-9,12-dienamide (**3m**).
- Figure 65S. <sup>1</sup>H NMR spectrum of (9Z,12Z)-1-(1-(3,5-dimethylphenyl)-ethoxy)-octadeca-9,12-dien-1-olate (**4a**).
- Figure 66S. <sup>13</sup>C NMR spectrum of (9Z,12Z)-1-(1-(3,5-dimethylphenyl)-ethoxy)-octadeca-9,12-dien-1-olate (**4a**).
- Figure 67S. <sup>1</sup>H NMR spectrum of (9Z,12Z)-N-(1-(3,5-dimethylphenyl)-ethyl)-octadeca-9,12-dien-1-amine (**4b**).
- Figure 68S. <sup>13</sup>C NMR spectrum of (9Z,12Z)-N-(1-(3,5-dimethylphenyl)-ethyl)-octadeca-9,12-dien-1-amine (**4b**).
- Figure 69S. <sup>1</sup>H NMR spectrum of (9Z,12Z)-N-(1-(3,5-dimethylphenyl)-ethyl)-octadeca-9,12-dienethioamide (**4c**).
- Figure 70S. <sup>13</sup>C NMR spectrum of (9Z,12Z)-N-(1-(3,5-dimethylphenyl)-ethyl)-octadeca-9,12-dienethioamide (**4c**).

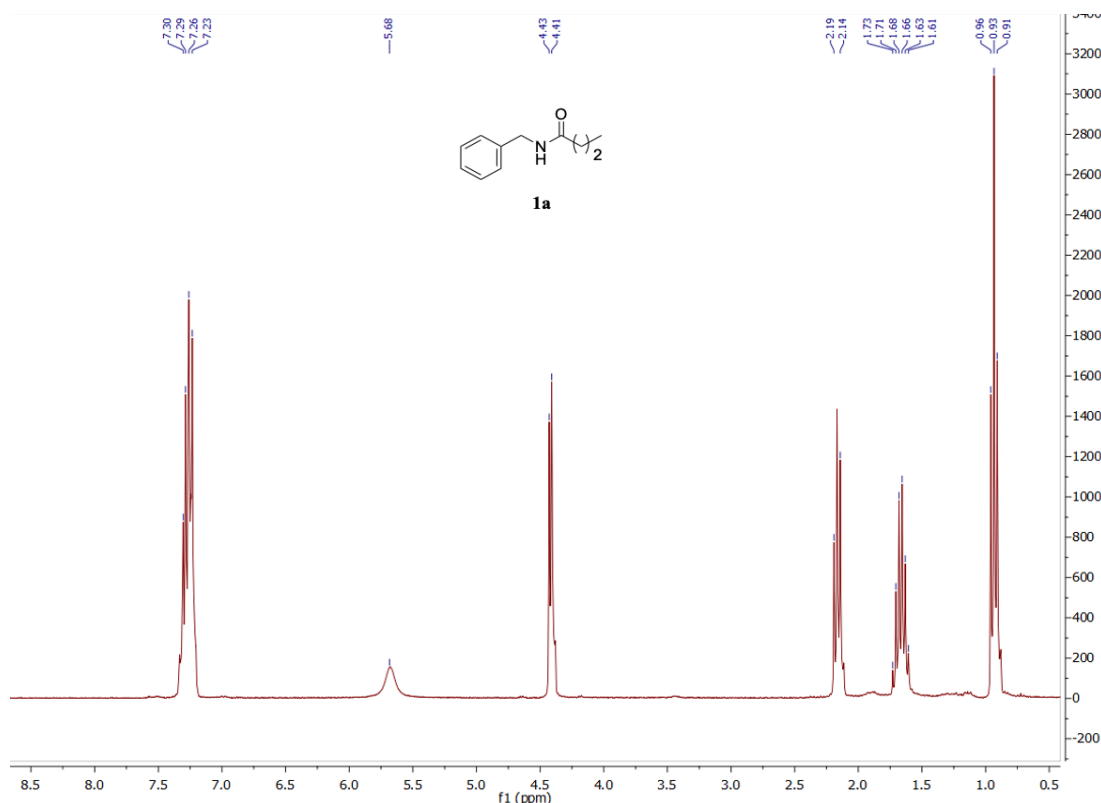

- Figure 1S. <sup>1</sup>H NMR (CDCl<sub>3</sub>, 300 MHz) spectrum of *N*-benzylbutyramide (**1a**).

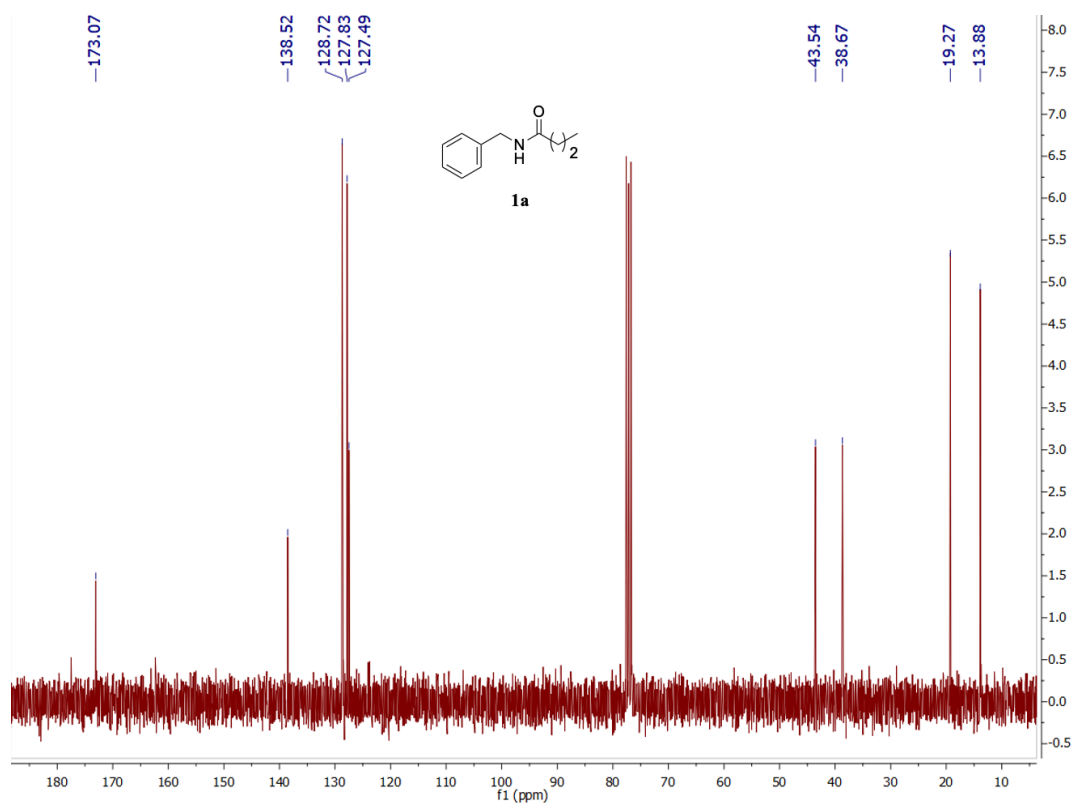

- Figure 2S. <sup>13</sup>C NMR (CDCl<sub>3</sub>, 75 MHz) spectrum of *N*-benzylbutyramide (**1a**).

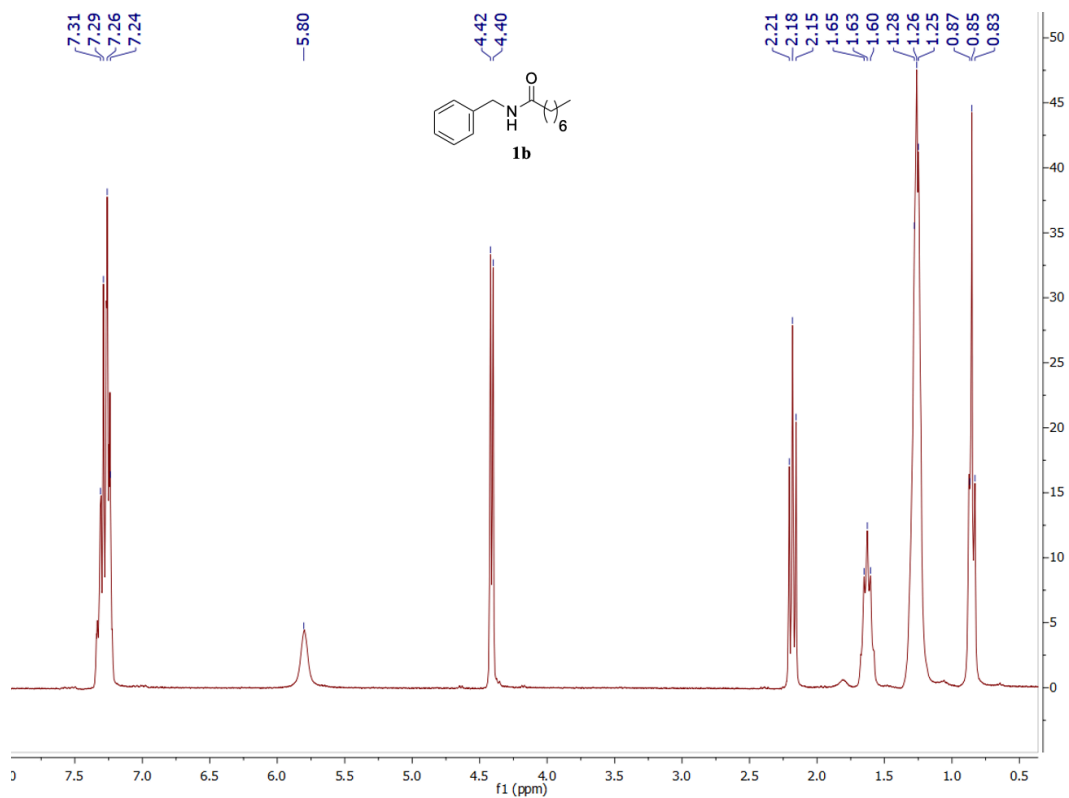

- Figure 3S. <sup>1</sup>H NMR (CDCl<sub>3</sub>, 300 MHz) spectrum of *N*-benzyl-octanamide (**1b**).

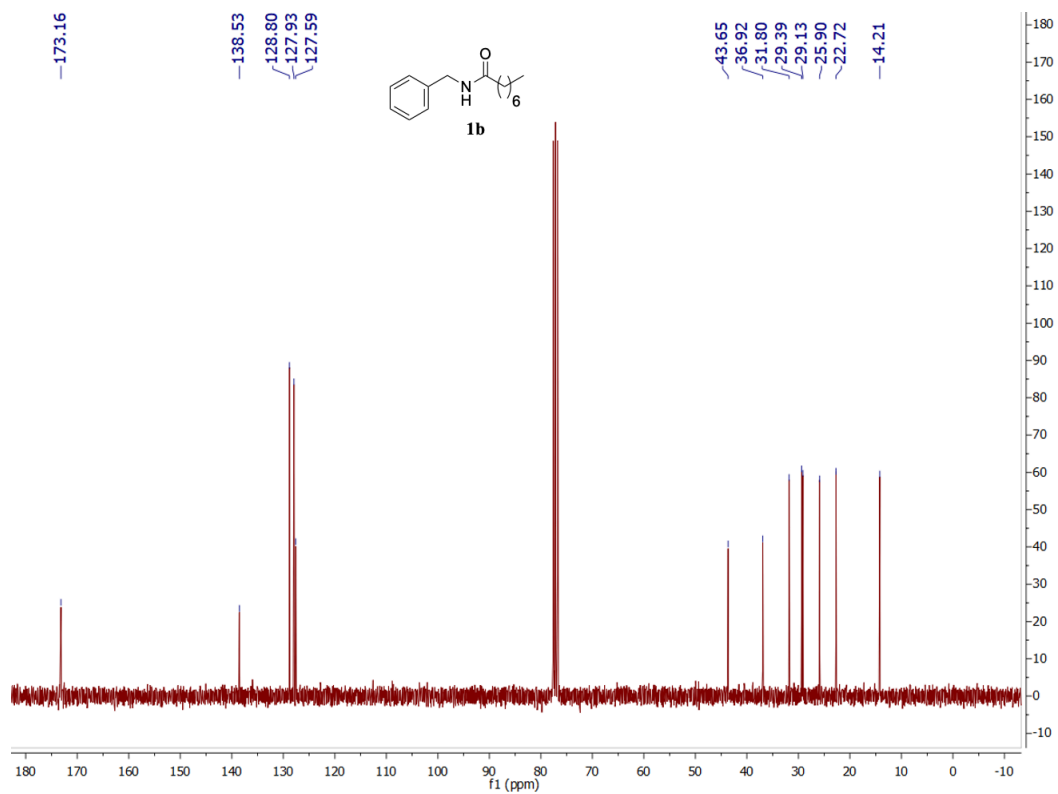

- Figure 4S. <sup>13</sup>C NMR (CDCl<sub>3</sub>, 75 MHz) spectrum of *N*-benzyl-octanamide (**1b**).

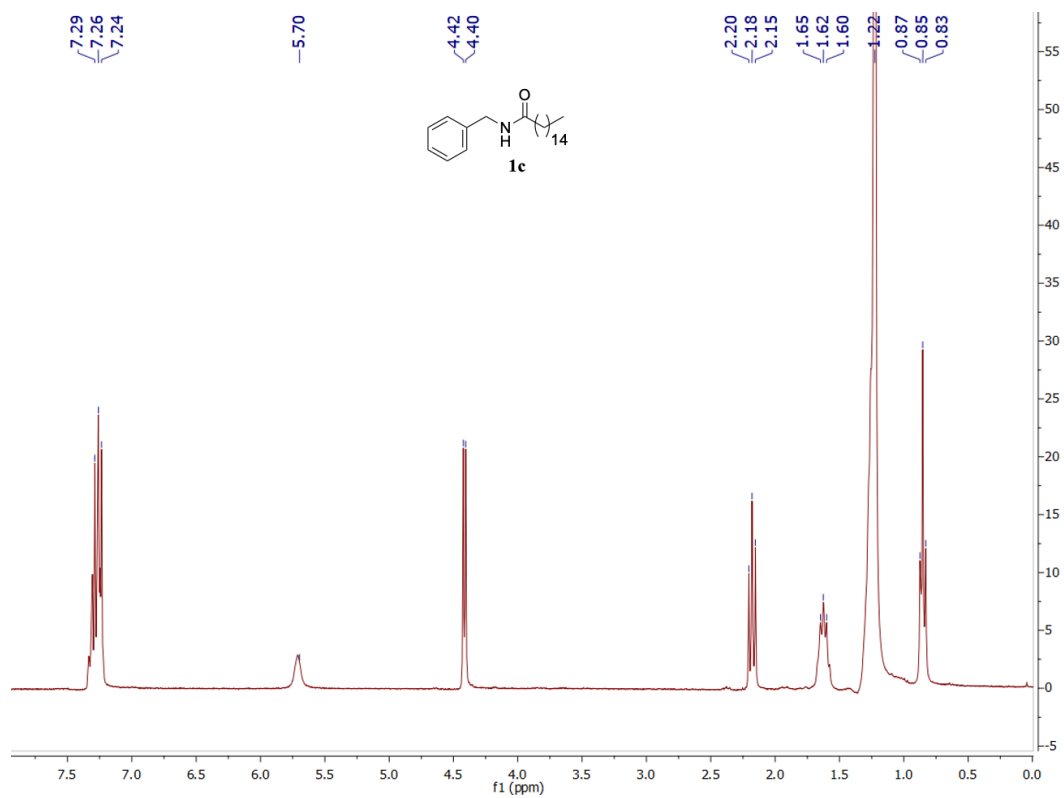

- Figure 5S.  $^1\text{H}$  NMR ( $\text{CDCl}_3$ , 300 MHz) spectrum of *N*-benzylhexadecanamide (**1c**).

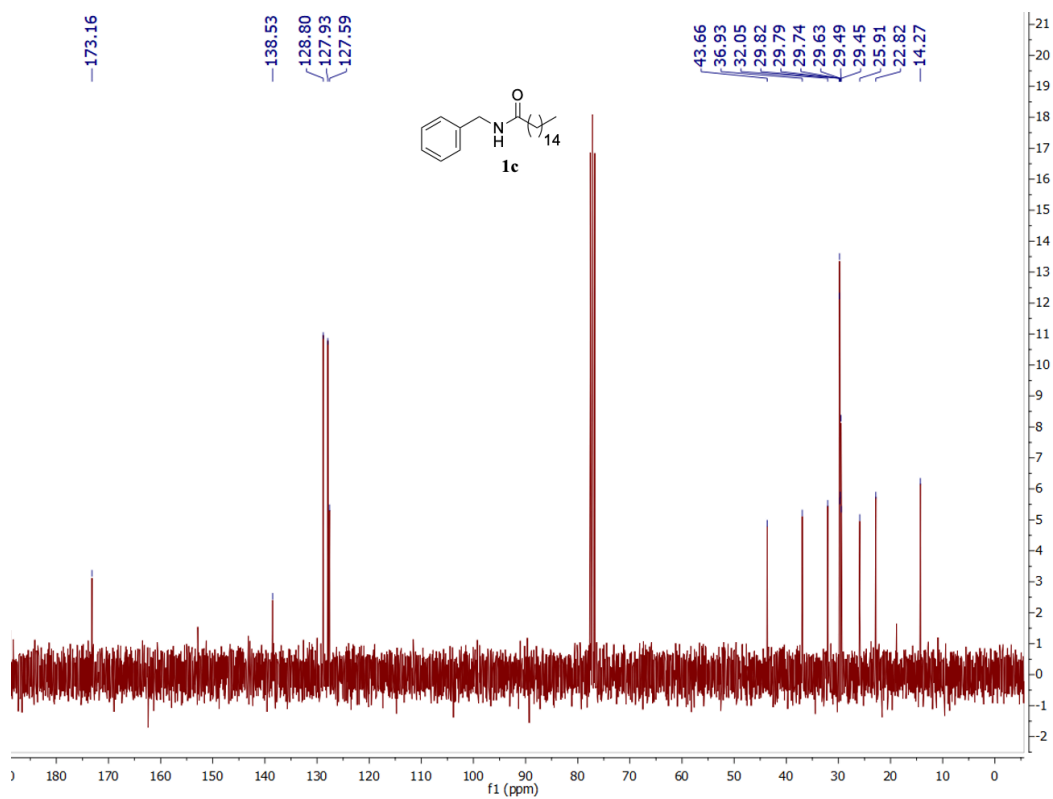

- Figure 6S.  $^{13}\text{C}$  NMR ( $\text{CDCl}_3$ , 75 MHz) spectrum of *N*-benzylhexadecanamide (**1c**).

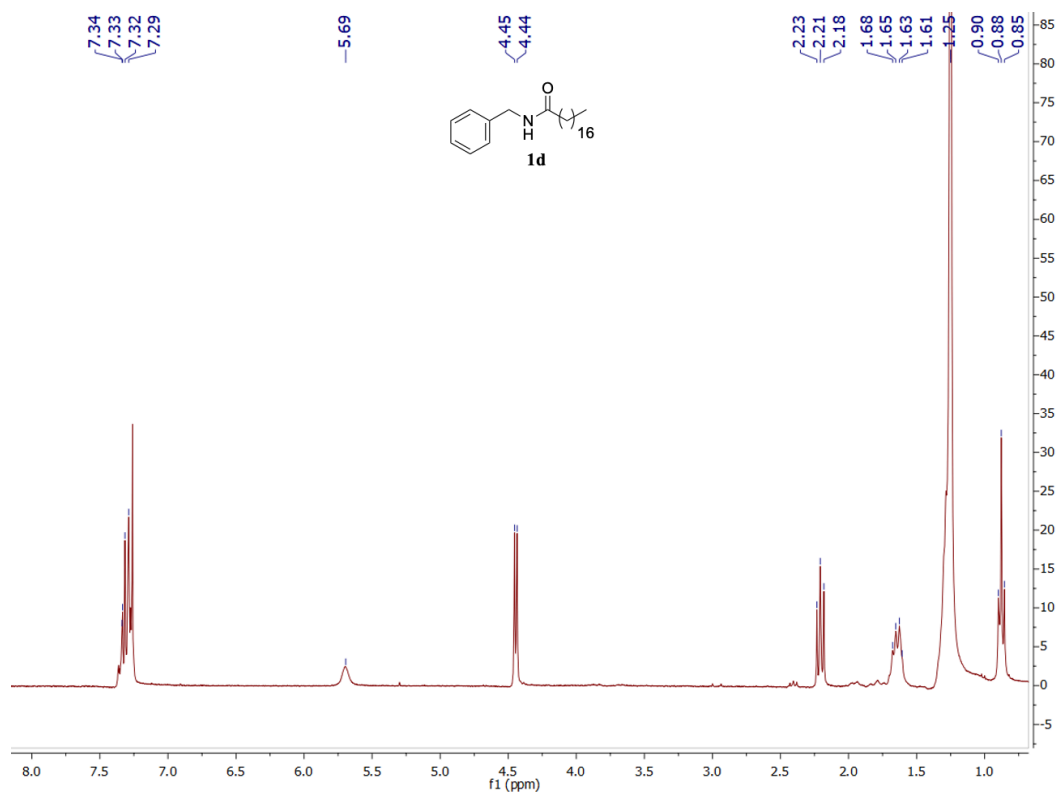

- Figure 7S.  $^1\text{H}$  NMR ( $\text{CDCl}_3$ , 300 MHz) spectrum of *N*-benzyl octadecanamide (**1d**).

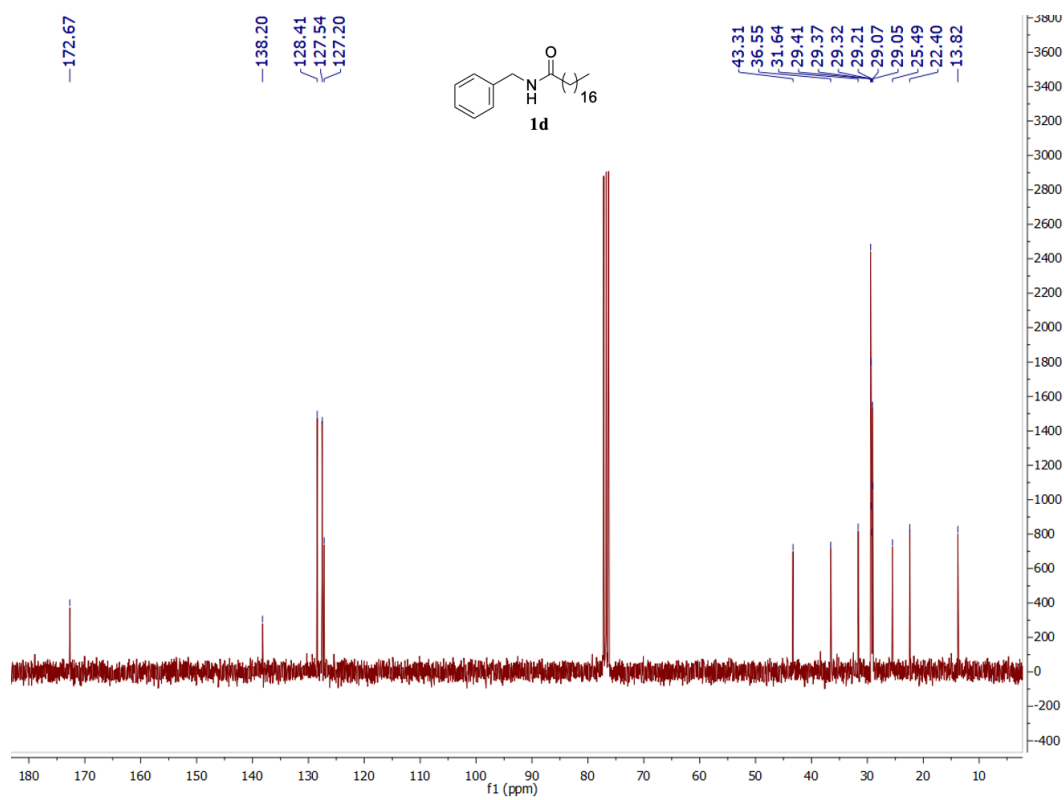

- Figure 8S.  $^{13}\text{C}$  NMR ( $\text{CDCl}_3$ , 75 MHz) spectrum of *N*-benzyl octadecanamide (**1d**).

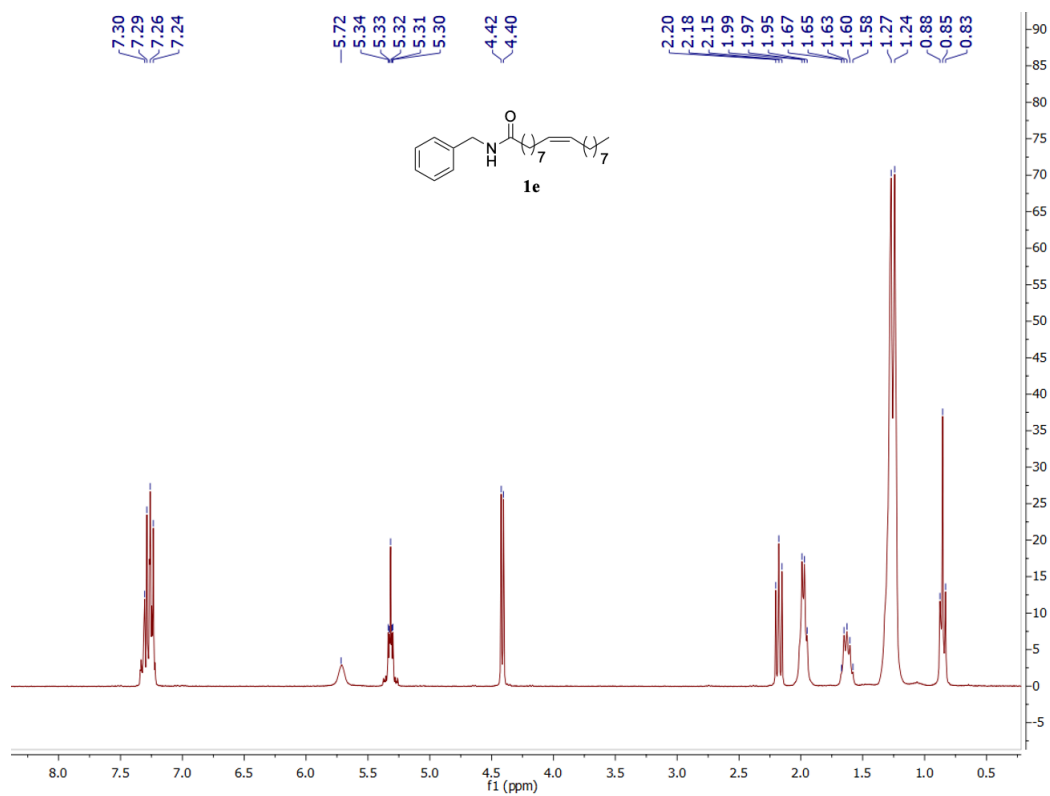

- Figure 9S. <sup>1</sup>H NMR (CDCl<sub>3</sub>, 300 MHz) spectrum of (9Z)-N-benzyl-octadec-9-enamide (**1e**).

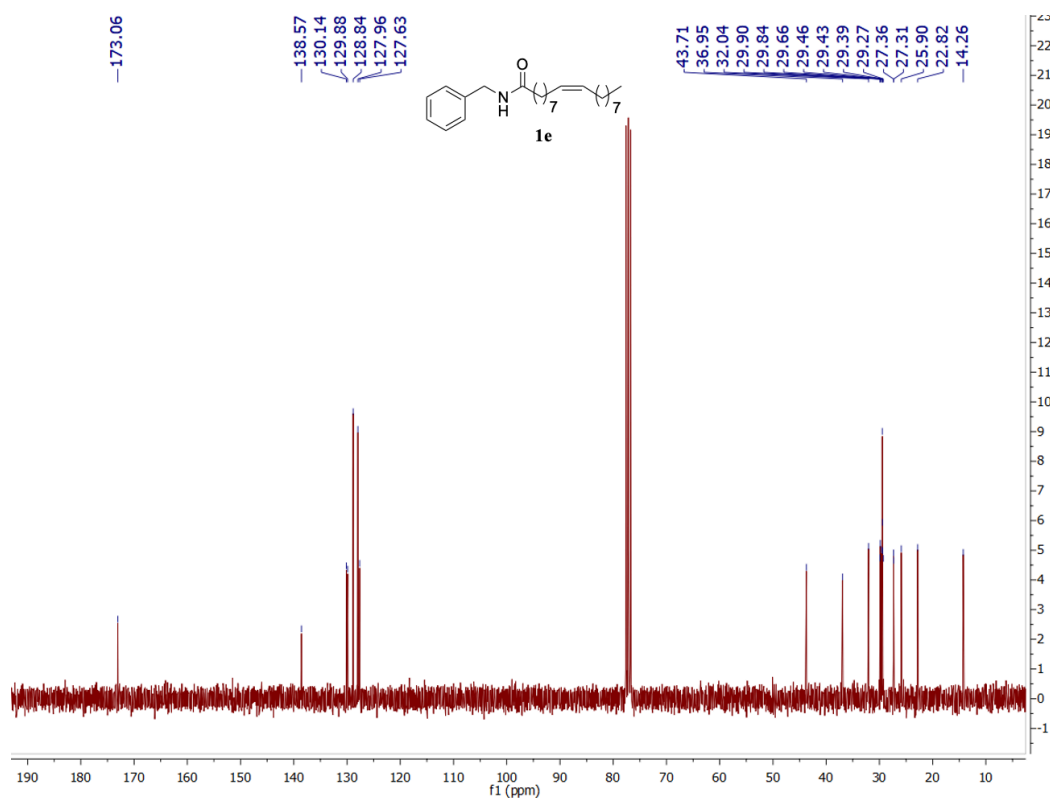

- Figure 10S. <sup>13</sup>C NMR (CDCl<sub>3</sub>, 75 MHz) spectrum of (9Z)-N-benzyl-octadec-9-enamide (**1e**).



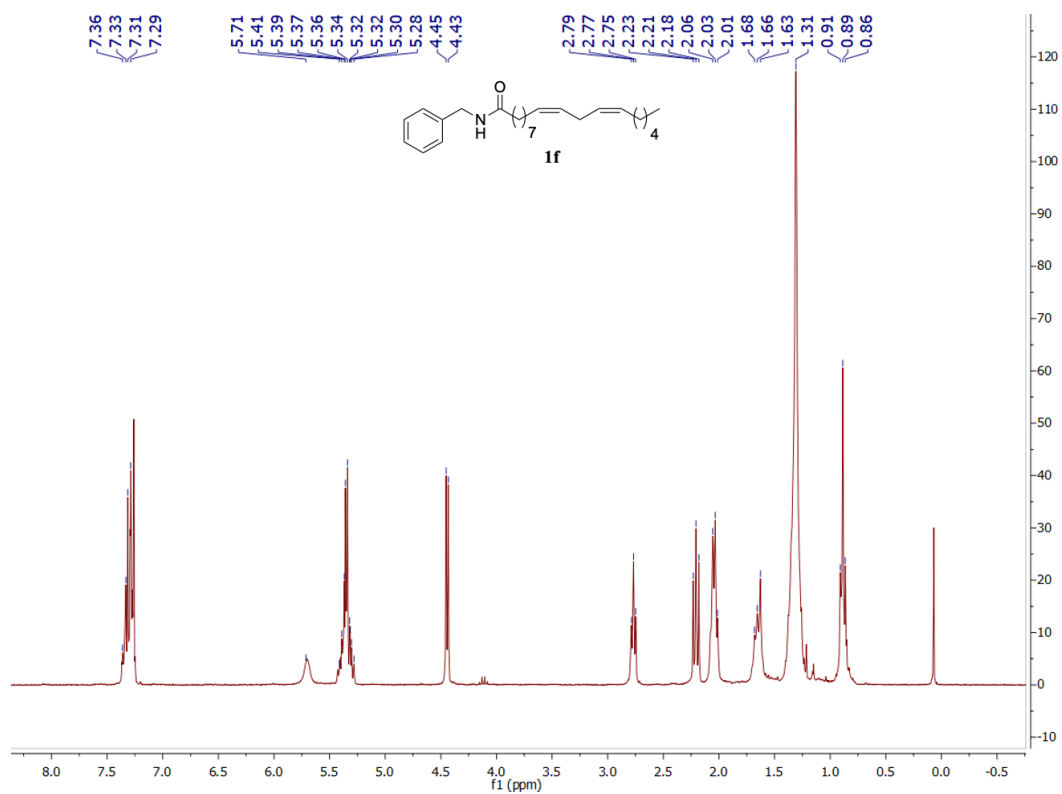

- Figure 11S.  $^1\text{H}$  NMR ( $\text{CDCl}_3$ , 300 MHz) spectrum of (9Z,12Z)-N-benzyl octadeca-9,12-dienamide (**1f**).

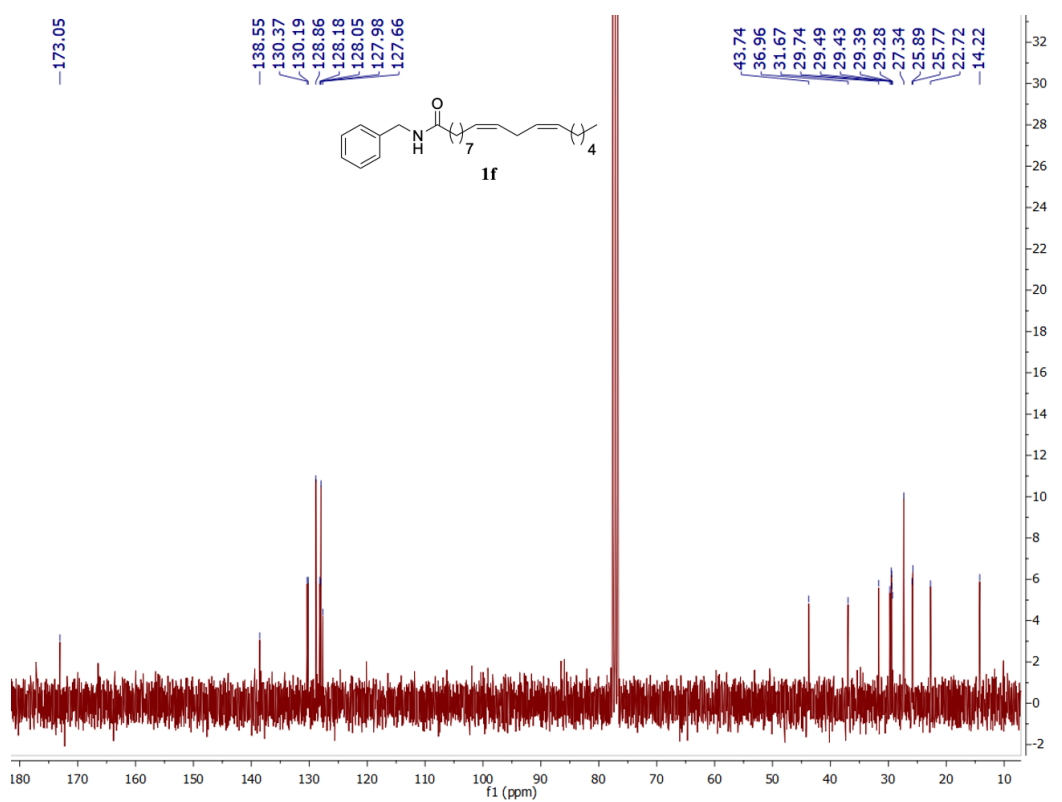

- Figure 12S.  $^{13}\text{C}$  NMR ( $\text{CDCl}_3$ , 75 MHz) spectrum of (9Z,12Z)-N-benzyl octadeca-9,12-dienamide (**1f**).

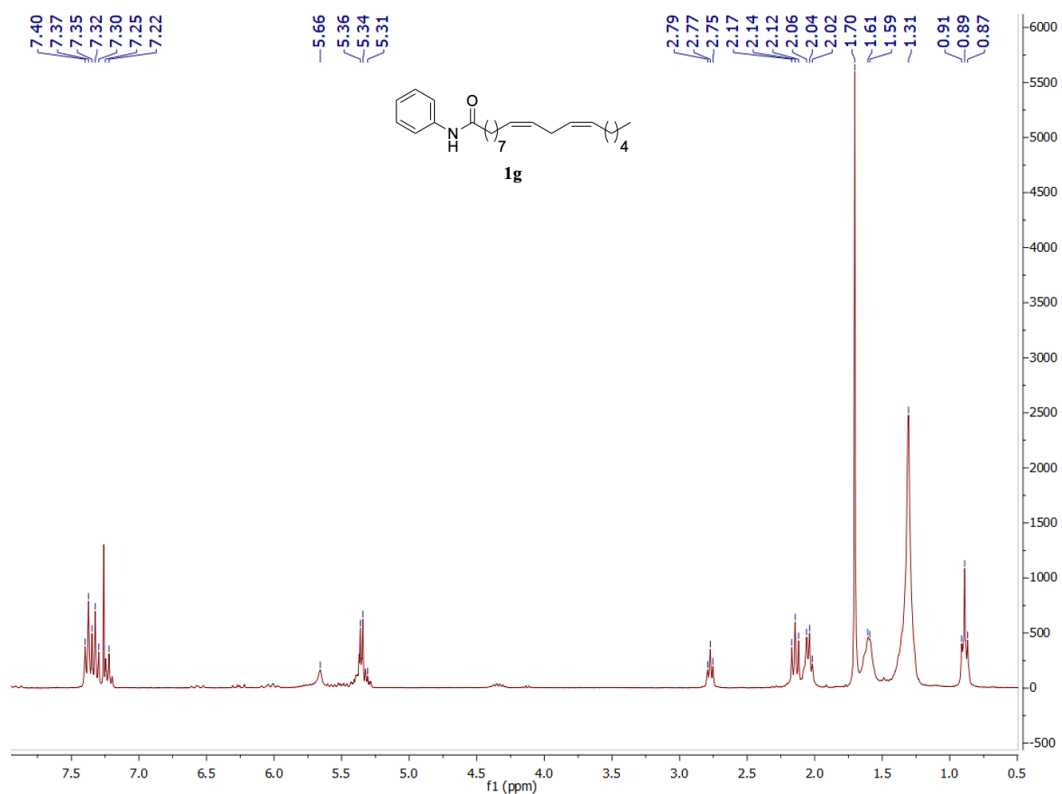

- Figure 13S. <sup>1</sup>H NMR (CDCl<sub>3</sub>, 300 MHz) spectrum of (9Z,12Z)-N-phenyloctadeca-9,12-dienamide (**1g**).

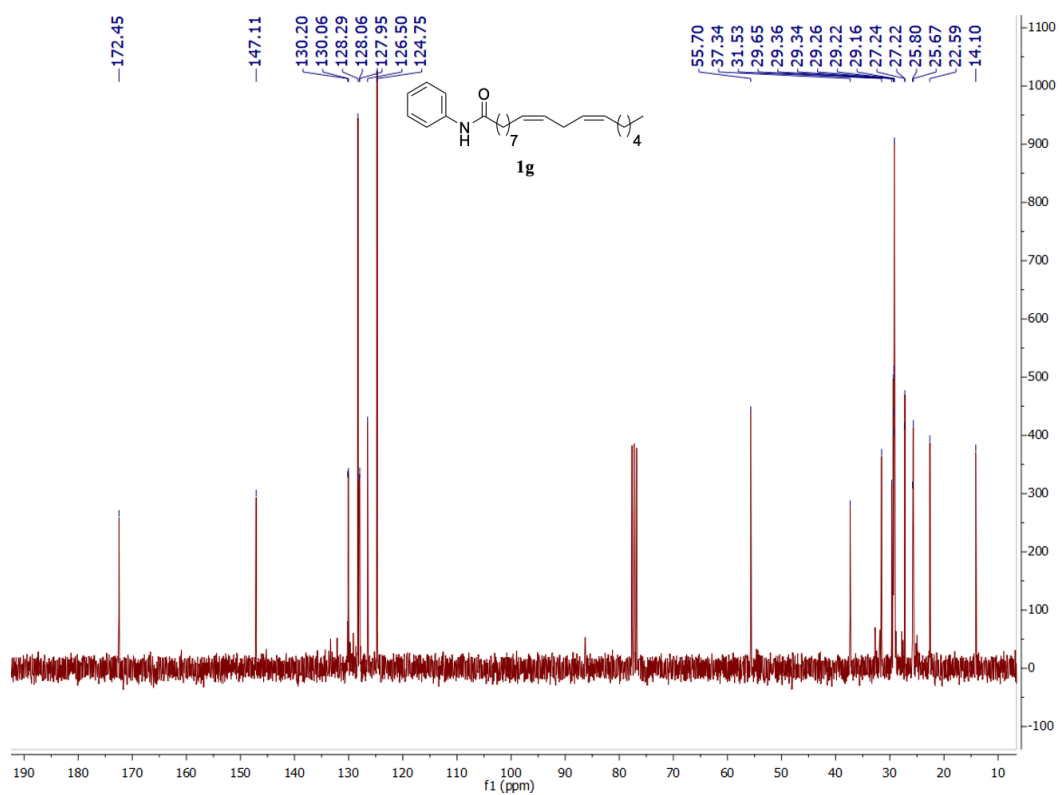

- Figure 14S. <sup>13</sup>C NMR (CDCl<sub>3</sub>, 75 MHz) spectrum of (9Z,12Z)-N-phenyloctadeca-9,12-dienamide (**1g**).

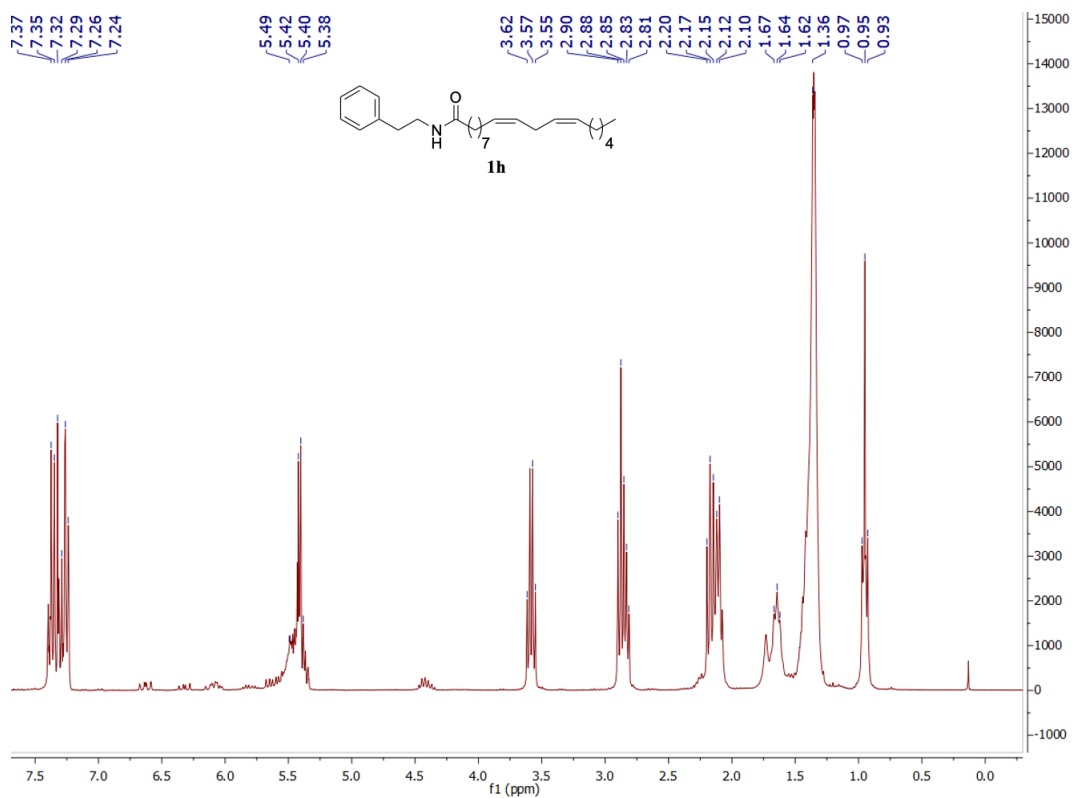

- Figure 15S.  $^1\text{H}$  NMR ( $\text{CDCl}_3$ , 300 MHz) spectrum of (9Z,12Z)-*N*-phenyloctadeca-9,12-dienamide (**1h**).

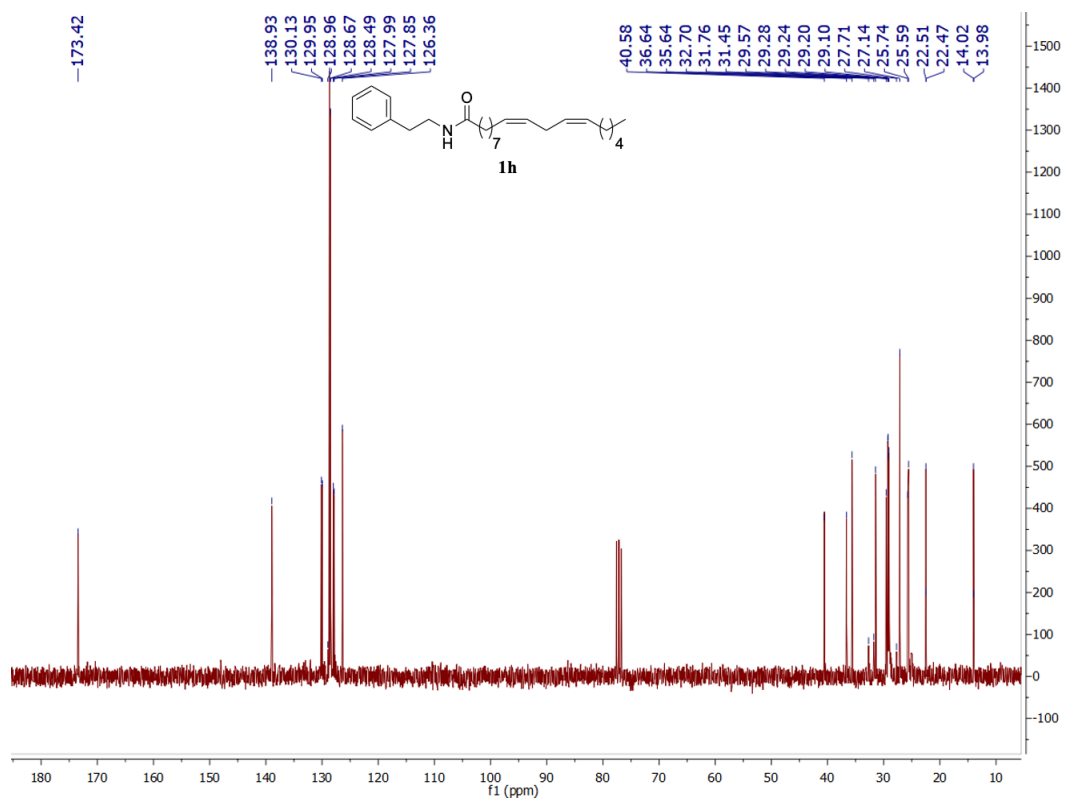

- Figure 16S.  $^{13}\text{C}$  NMR ( $\text{CDCl}_3$ , 75 MHz) spectrum of (9Z,12Z)-*N*-phenyloctadeca-9,12-dienamide (**1h**).

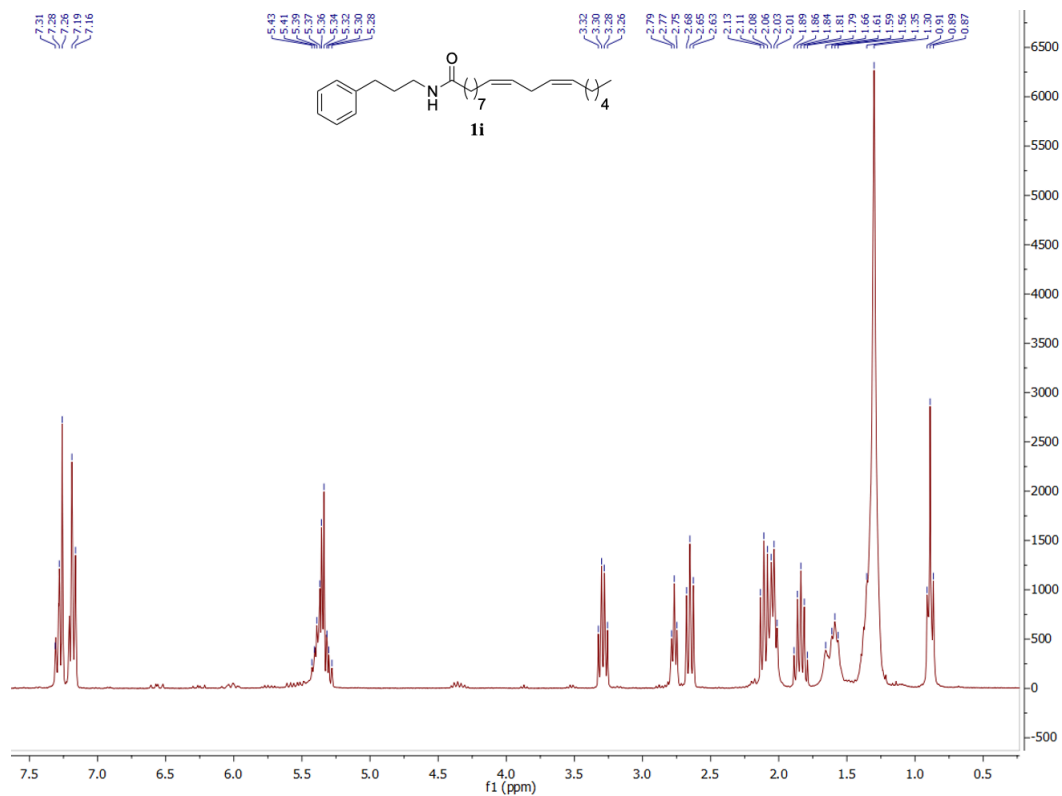

- Figure 17S. <sup>1</sup>H NMR (CDCl<sub>3</sub>, 300 MHz) spectrum of (9Z,12Z)-N-(3-phenylpropyl)-octadeca-9,12-dienamide (**1i**).

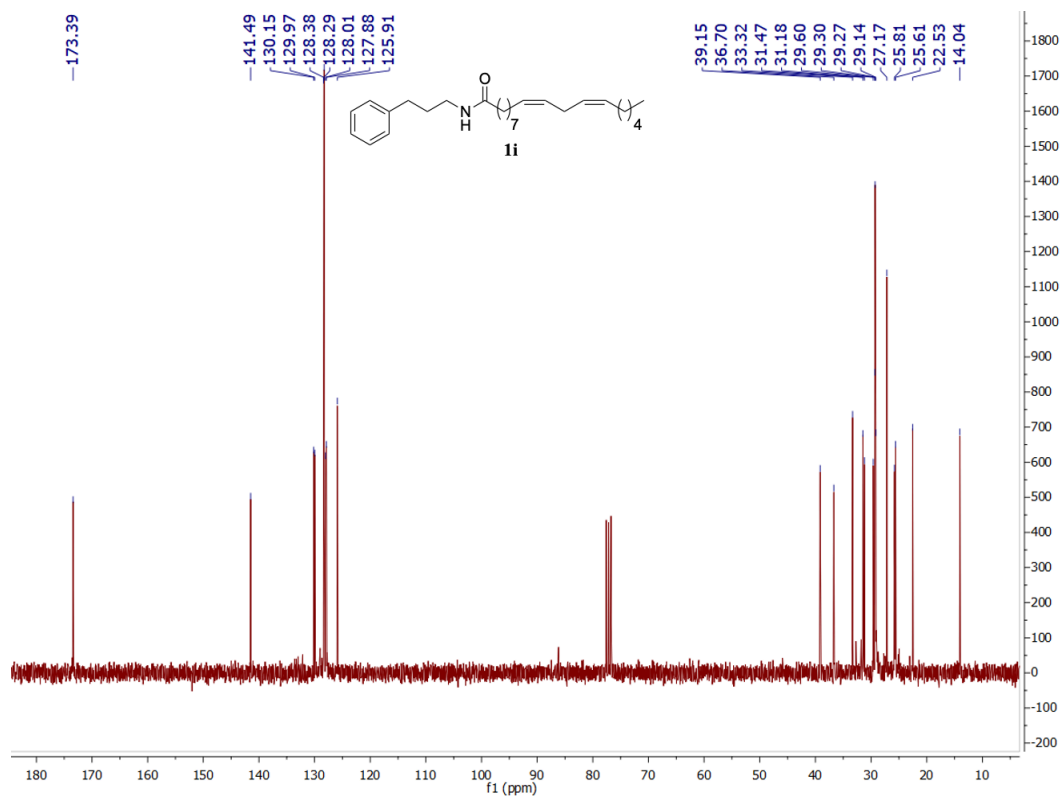

- Figure 18S. <sup>13</sup>C NMR (CDCl<sub>3</sub>, 75 MHz) spectrum of (9Z,12Z)-N-(3-phenylpropyl)-octadeca-9,12-dienamide (**1i**).

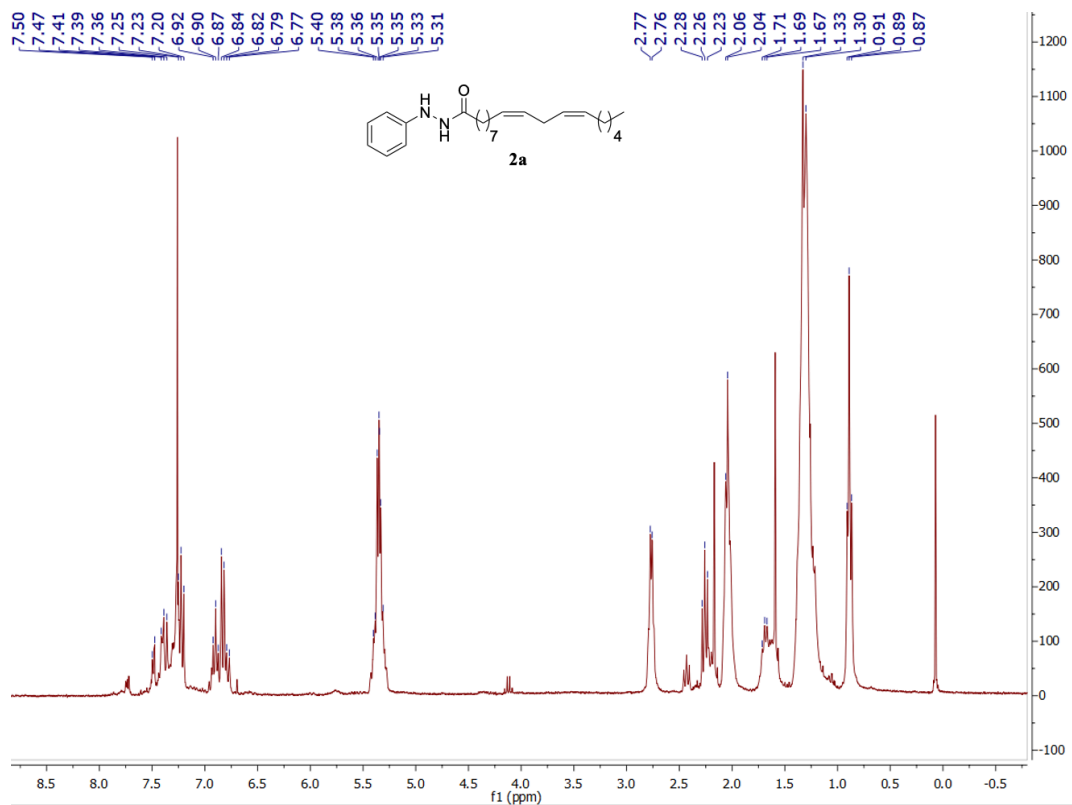

- Figure 19S. <sup>1</sup>H NMR (CDCl<sub>3</sub>, 300 MHz) spectrum of (9Z,12Z)-N'-phenyloctadeca-9,12-dienehydrazide (**2a**).

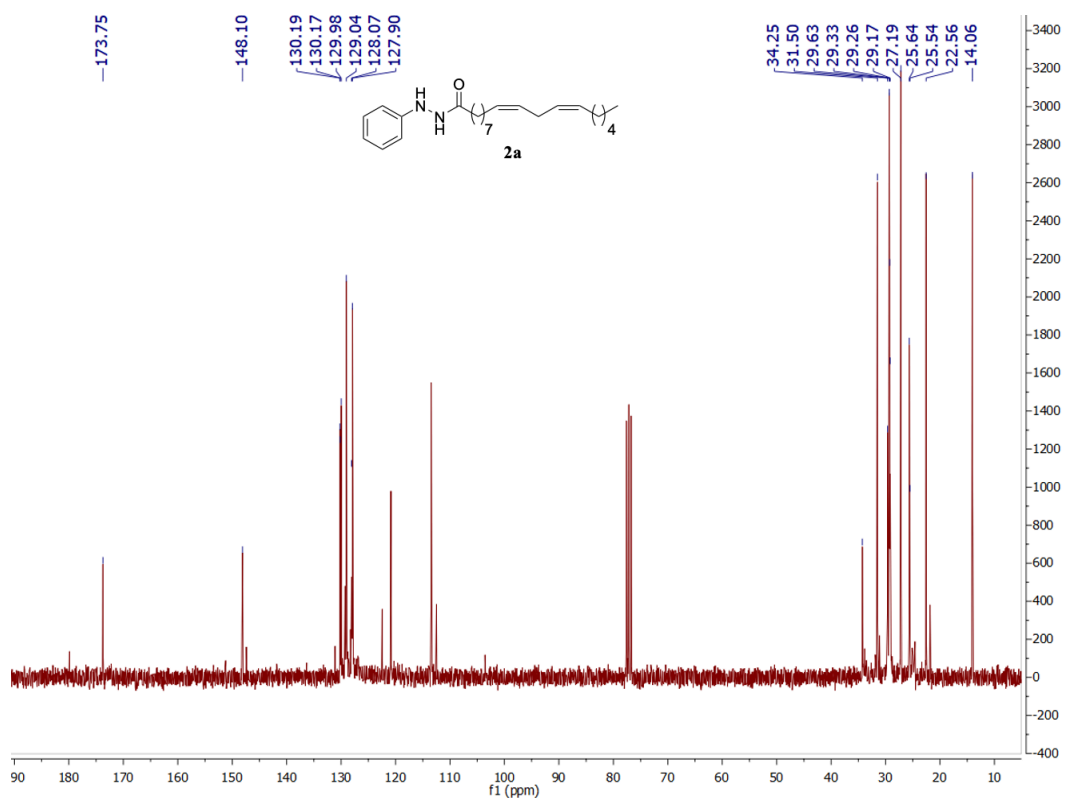

- Figure 20S. <sup>13</sup>C NMR (CDCl<sub>3</sub>, 75 MHz) spectrum of (9Z,12Z)-N'-phenyloctadeca-9,12-dienehydrazide (**2a**).

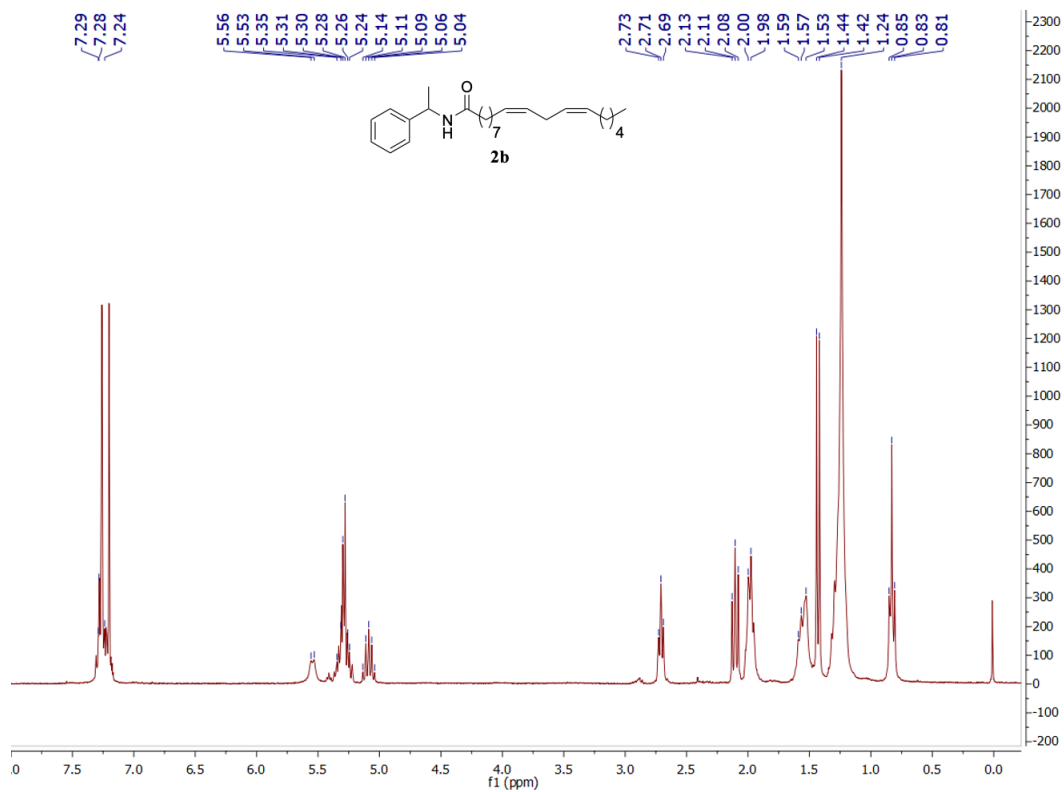

- Figure 21S. <sup>1</sup>H NMR (CDCl<sub>3</sub>, 300 MHz) spectrum of (9Z,12Z)-N-(1-phenylethyl)-octadeca-9,12-dienamide (**2b**).

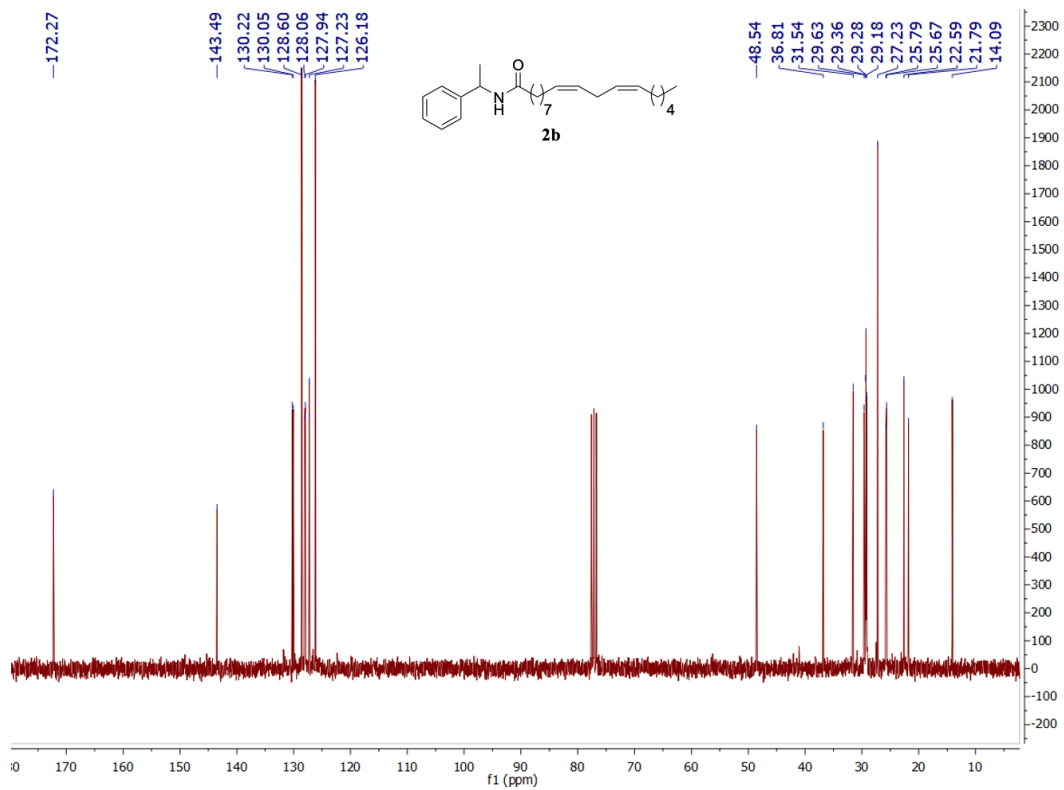

- Figure 22S. <sup>13</sup>C NMR (CDCl<sub>3</sub>, 75 MHz) spectrum of (9Z,12Z)-N-(1-phenylethyl)-octadeca-9,12-dienamide (**2b**).

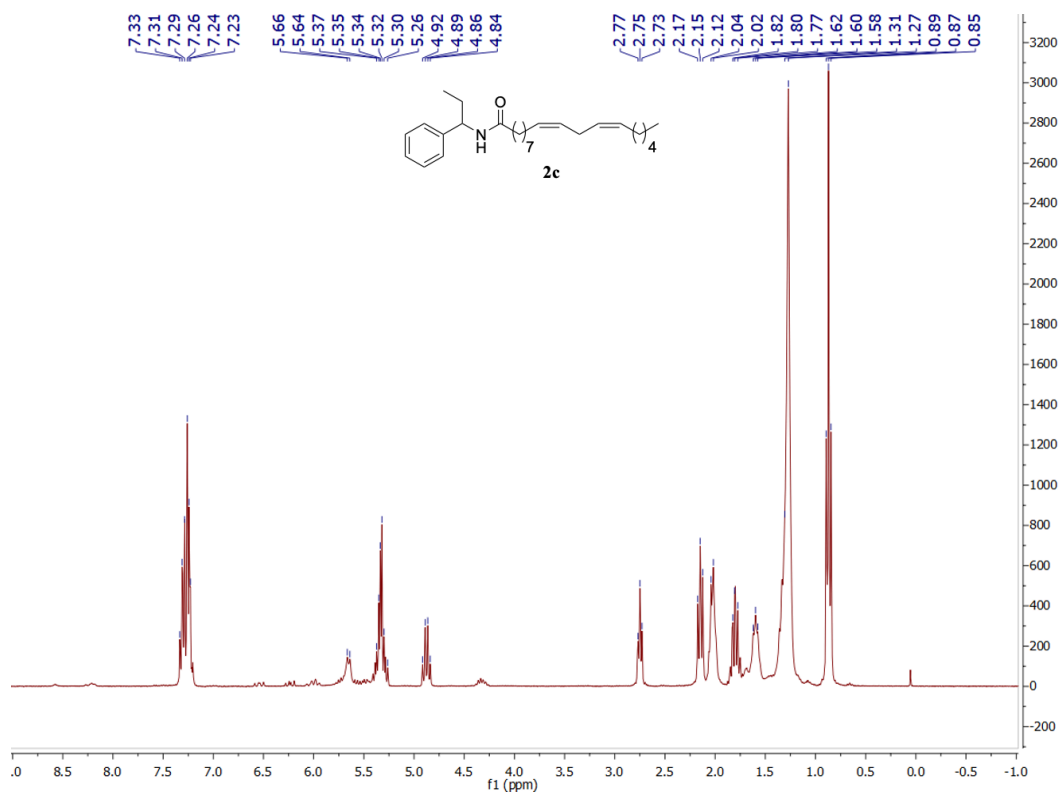

- Figure 23S. <sup>1</sup>H NMR (CDCl<sub>3</sub>, 300 MHz) spectrum of (9Z,12Z)-N-(1-phenylpropyl)-octadeca-9,12-dienamide (**2c**).

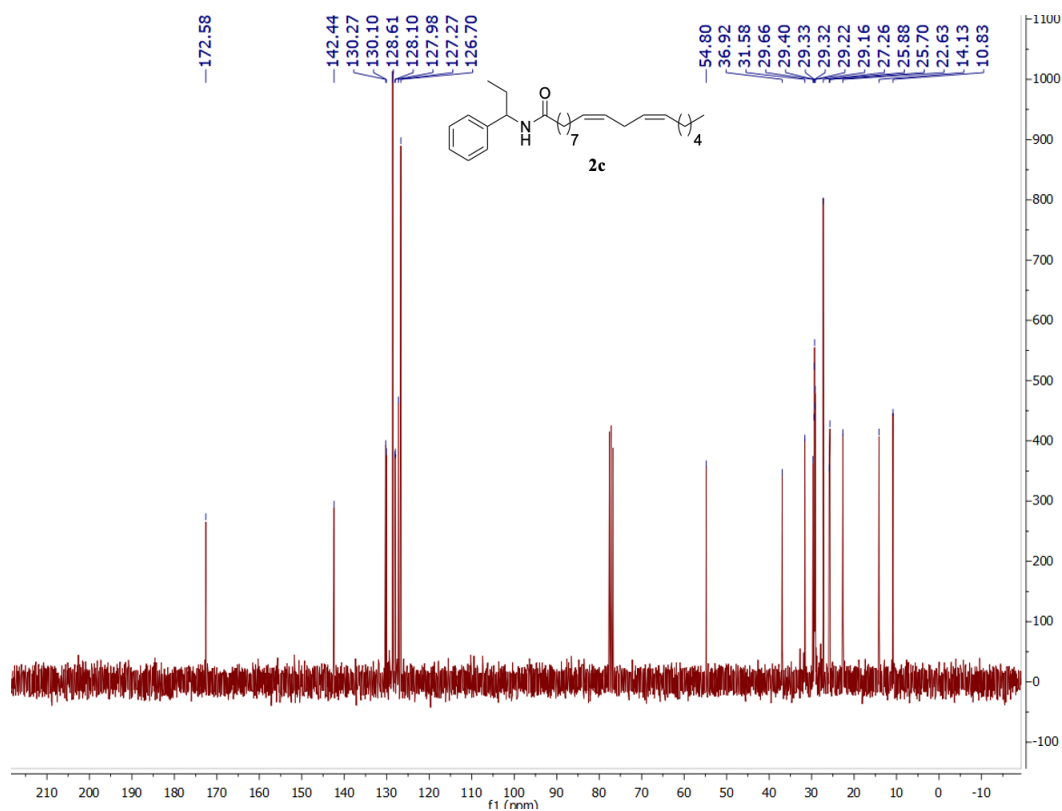

- Figure 24S. <sup>13</sup>C NMR (CDCl<sub>3</sub>, 75 MHz) spectrum of (9Z,12Z)-N-(1-phenylpropyl)-octadeca-9,12-dienamide (**2c**).

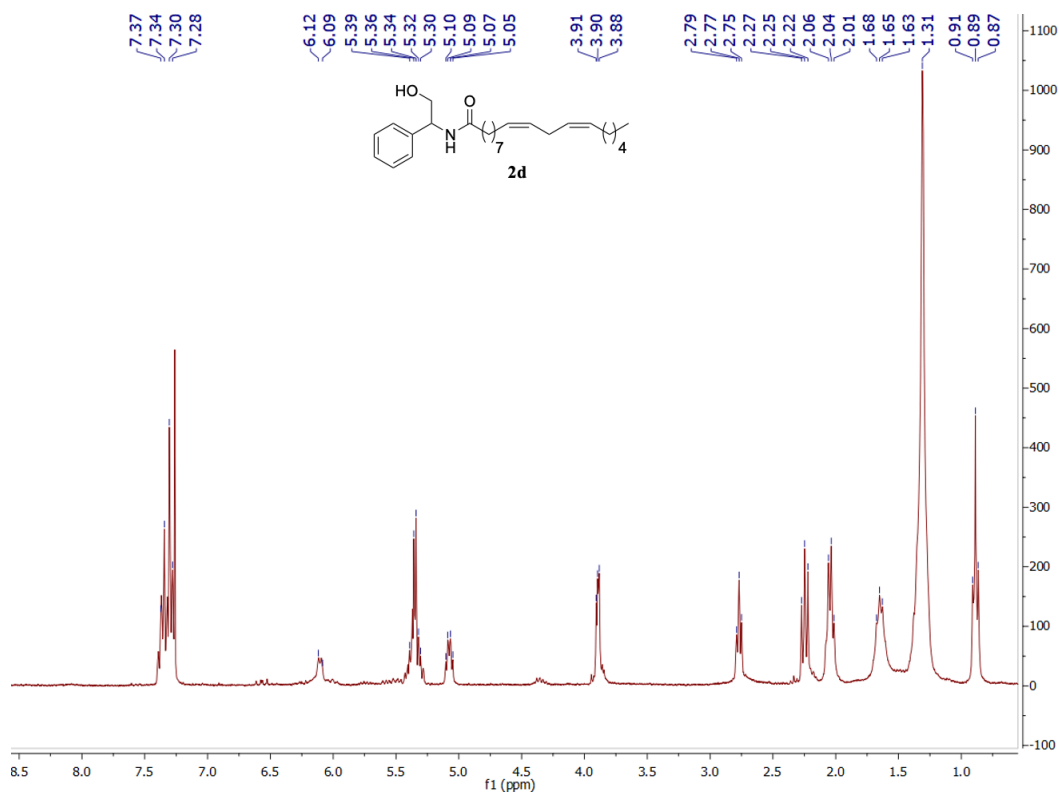

- Figure 25S. <sup>1</sup>H NMR (CDCl<sub>3</sub>, 300 MHz) spectrum of (9Z,12Z)-N-(2-hydroxy-1-phenylethyl)-octadeca-9,12-dienamide (**2d**).

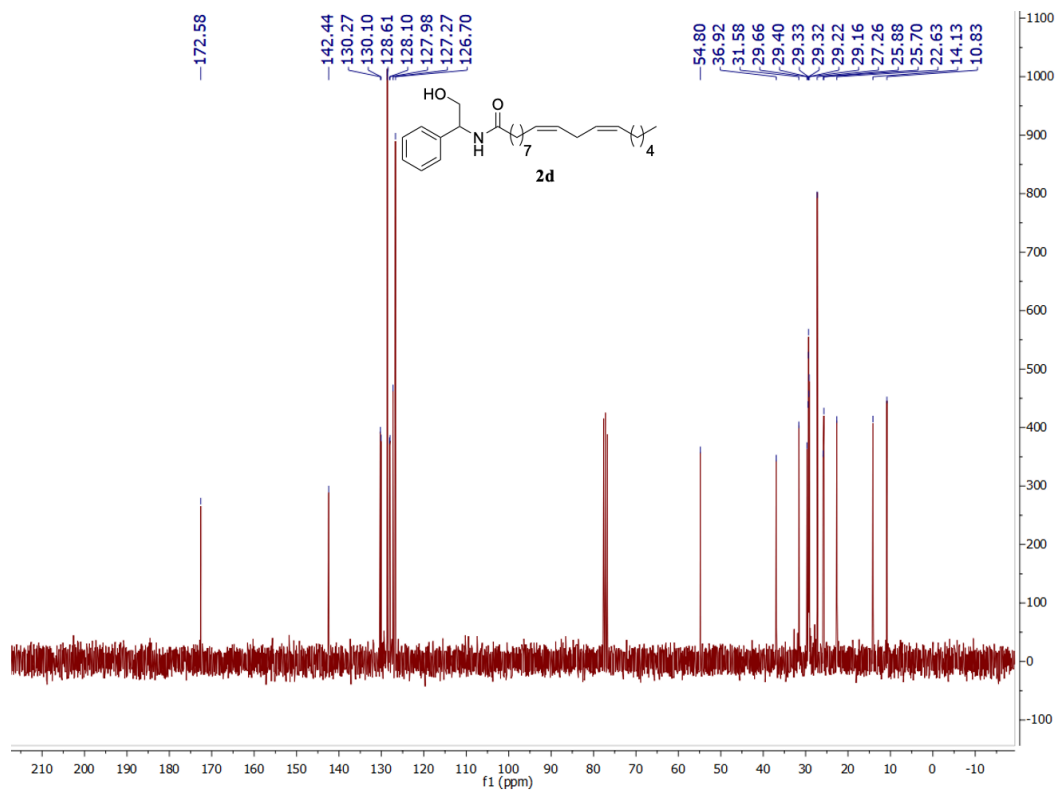

- Figure 26S. <sup>13</sup>C NMR (CDCl<sub>3</sub>, 75 MHz) spectrum of (9Z,12Z)-N-(2-hydroxy-1-phenylethyl)-octadeca-9,12-dienamide (**2d**).



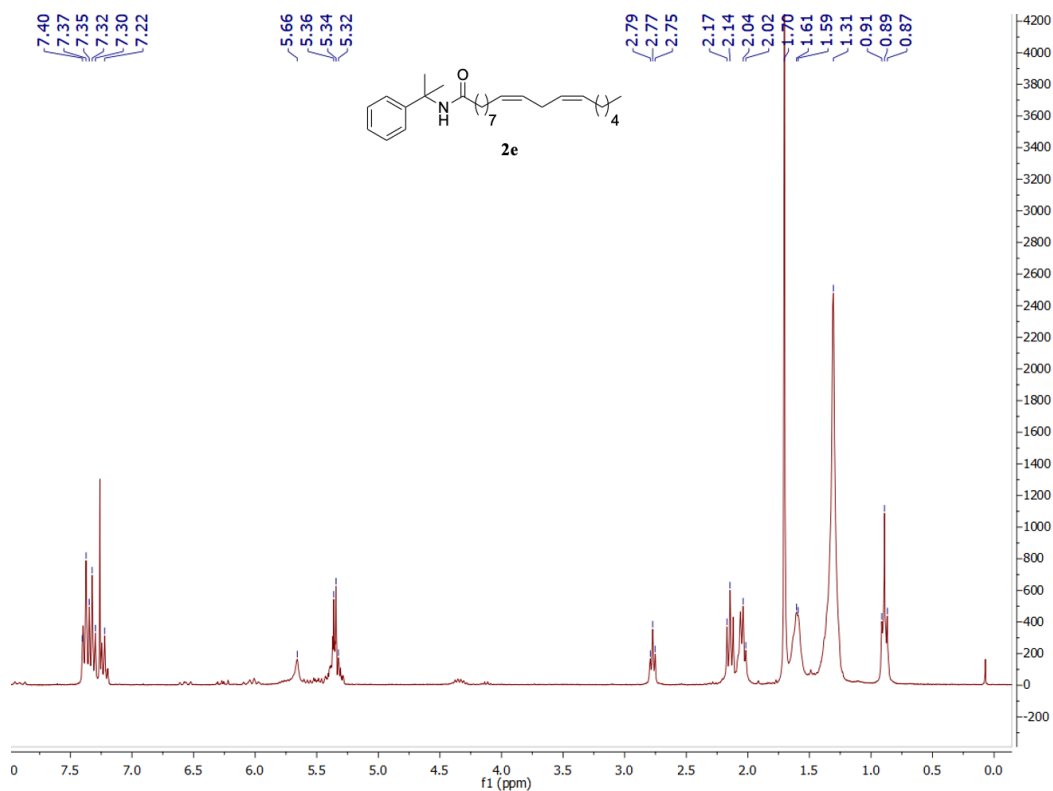

- Figure 27S. <sup>1</sup>H NMR (CDCl<sub>3</sub>, 300 MHz) spectrum of (9Z,12Z)-N-(2-phenylpropan-2-yl)-octadeca-9,12-dienamide (**2e**).

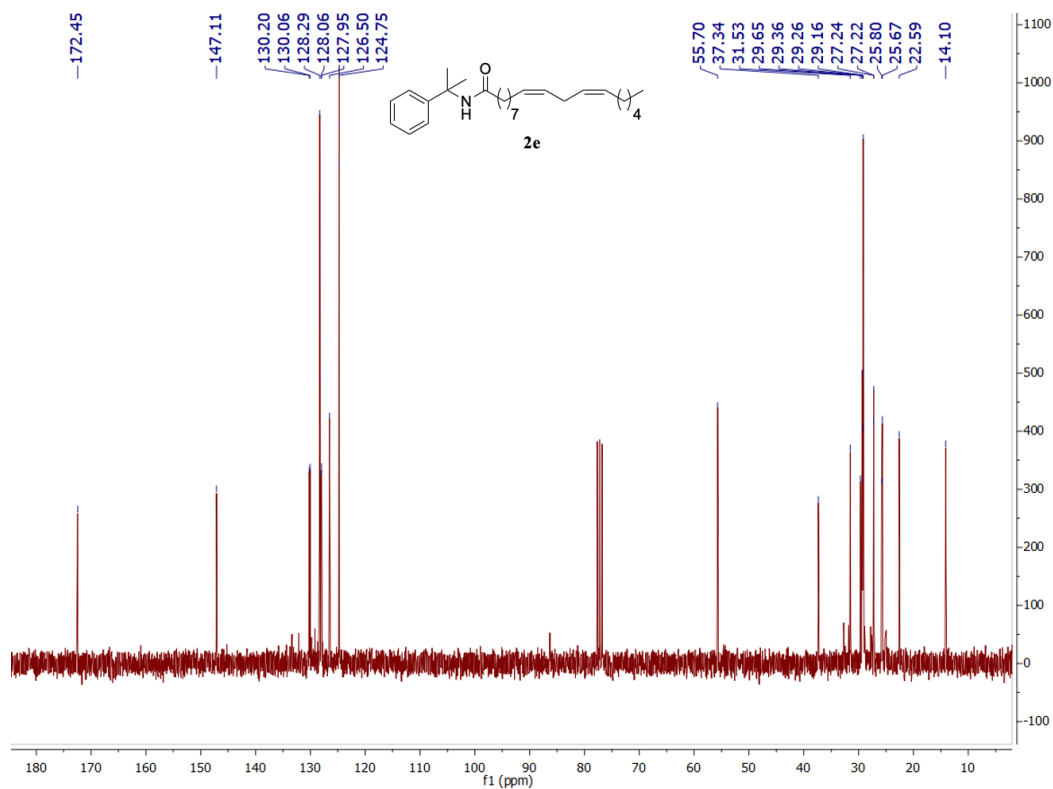

- Figure 28S. <sup>13</sup>C NMR (CDCl<sub>3</sub>, 75 MHz) spectrum of (9Z,12Z)-N-(2-phenylpropan-2-yl)-octadeca-9,12-dienamide (**2e**).

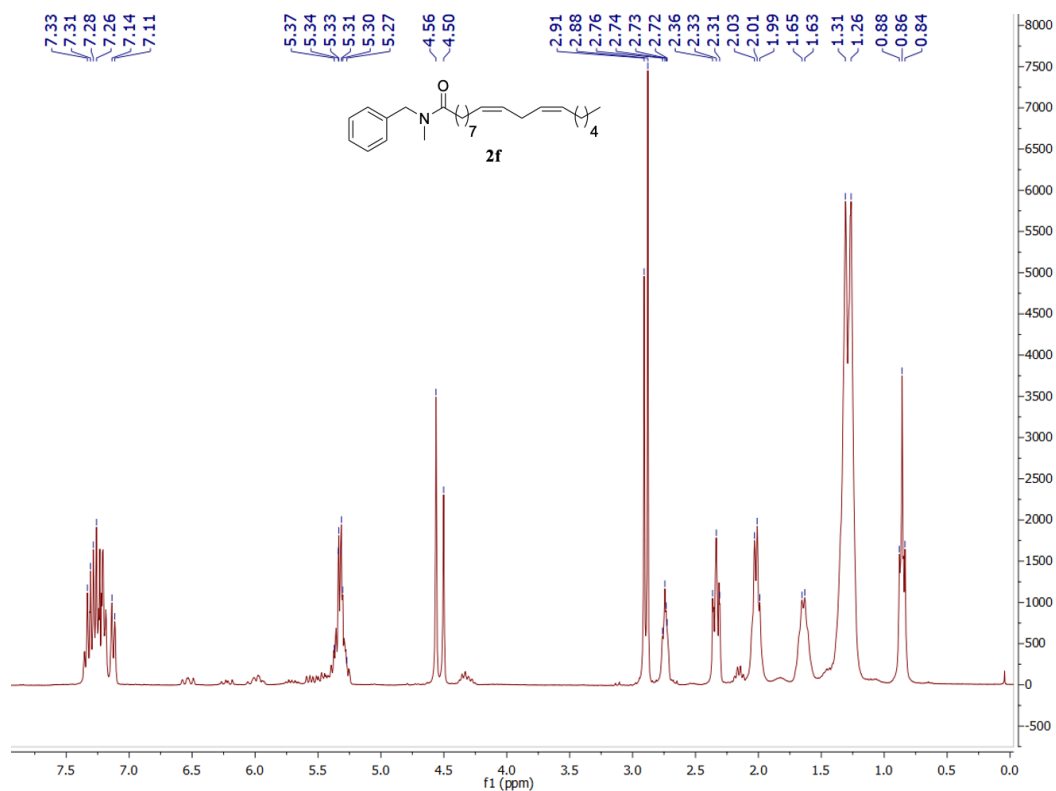

- Figure 29S.  $^1\text{H}$  NMR ( $\text{CDCl}_3$ , 300 MHz) spectrum of (9Z,12Z)-*N*-benzyl-*N*-methyloctadeca-9,12-dienamide (**2f**).

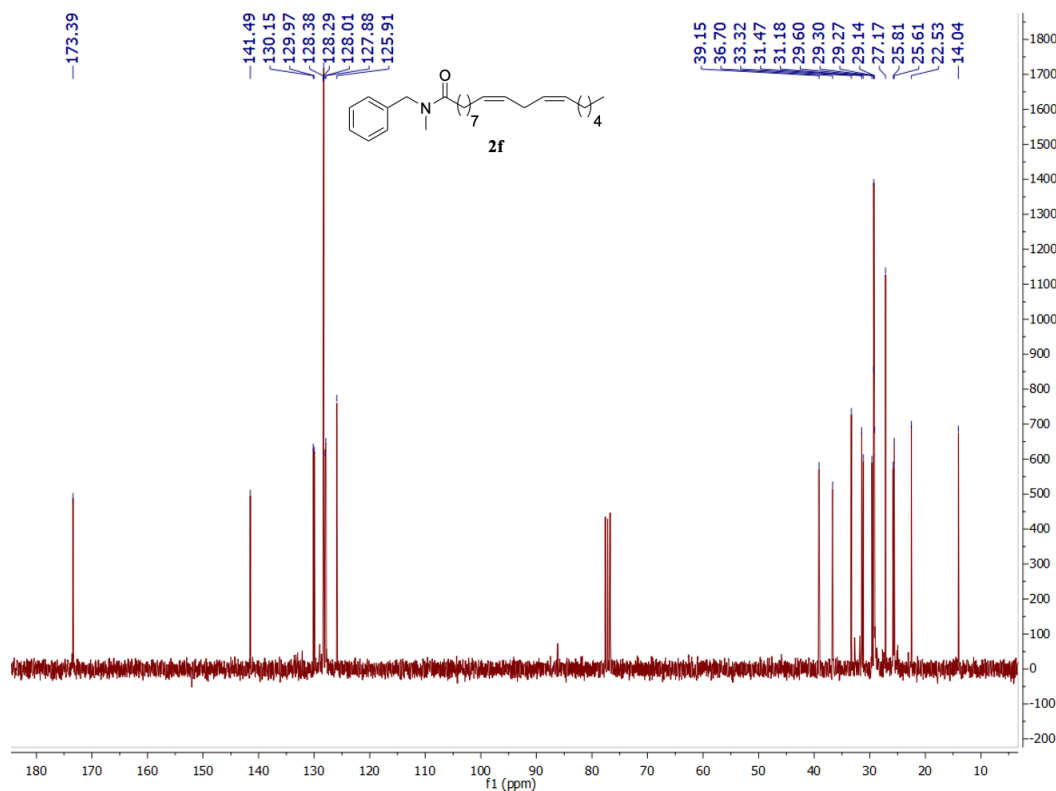

- Figure 30S.  $^{13}\text{C}$  NMR ( $\text{CDCl}_3$ , 75 MHz) spectrum of (9Z,12Z)-*N*-benzyl-*N*-methyloctadeca-9,12-dienamide (**2f**).

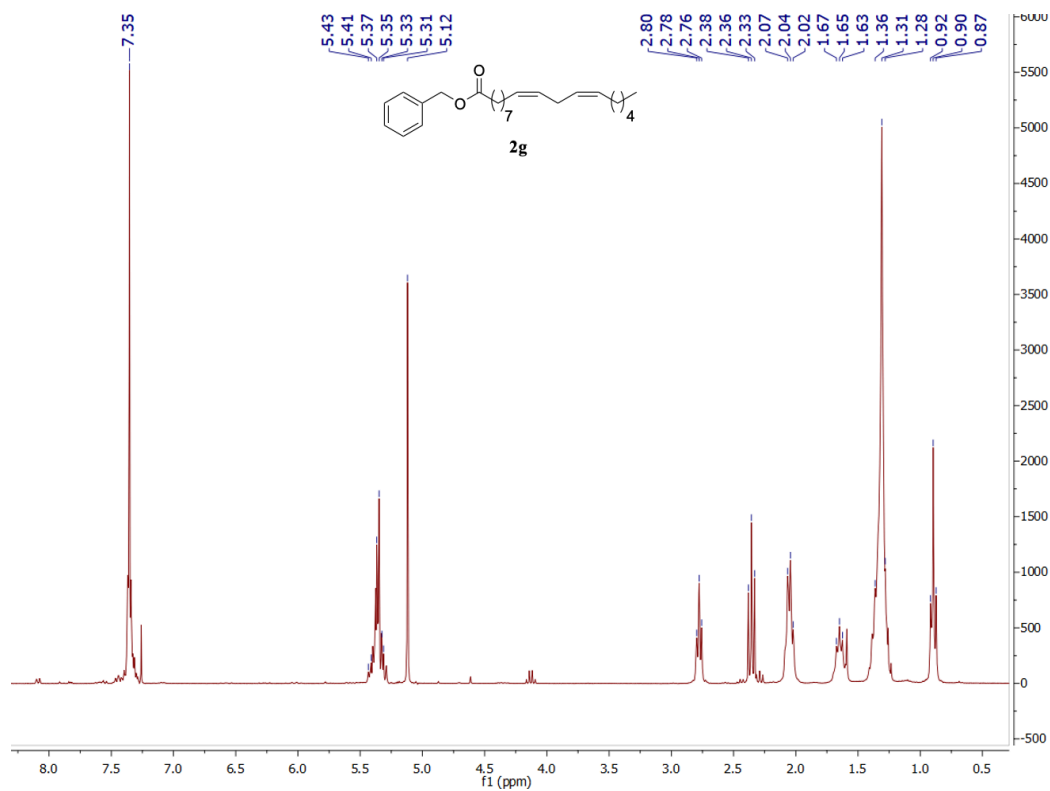

- Figure 31S. <sup>1</sup>H NMR (CDCl<sub>3</sub>, 300 MHz) spectrum of (9Z,12Z)-1-(benzyloxy)-octadeca-9,12-dien-1-olate (**2g**).

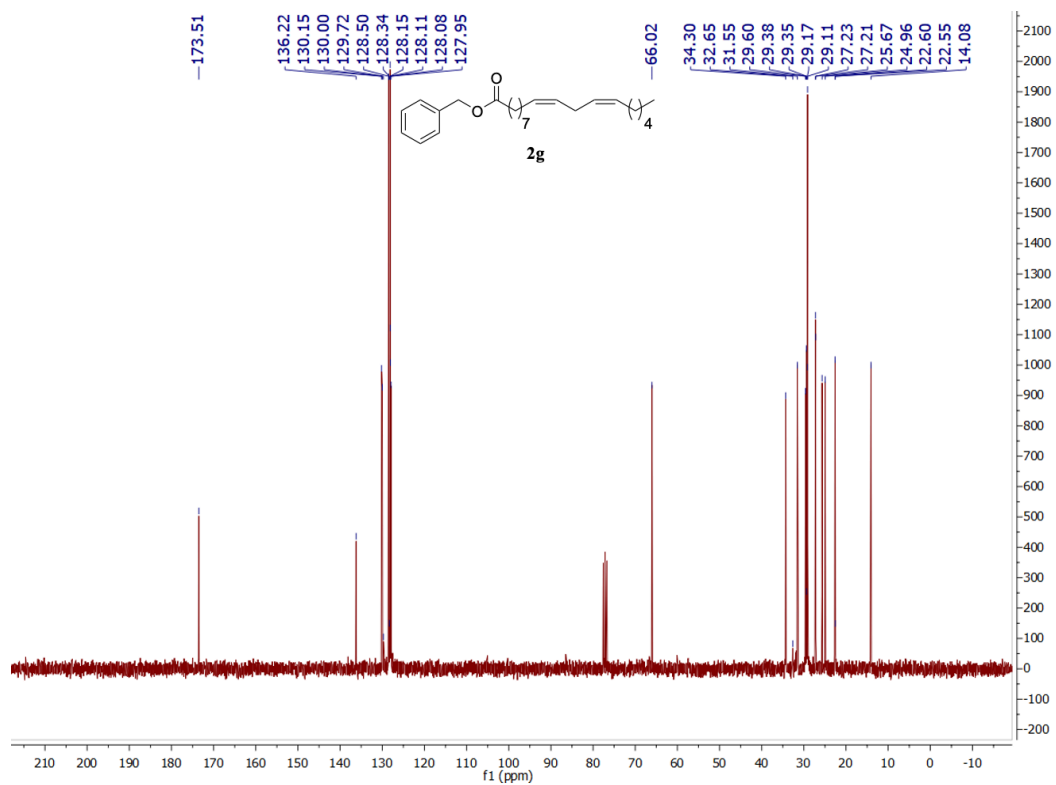

- Figure 32S. <sup>13</sup>C NMR (CDCl<sub>3</sub>, 75 MHz) spectrum of (9Z,12Z)-1-(benzyloxy)-octadeca-9,12-dien-1-olate (**2g**).

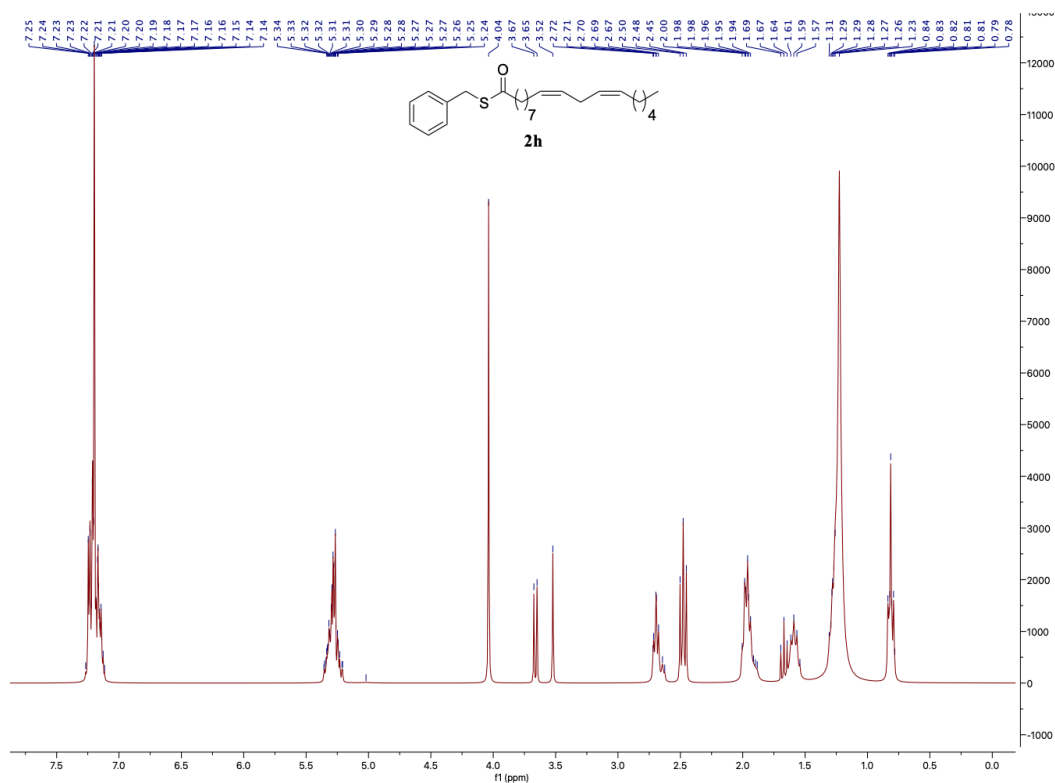

- Figure 33S. <sup>1</sup>H NMR (CDCl<sub>3</sub>, 300 MHz) spectrum of (9Z,12Z)-1-(benzylthio)-octadeca-9,12-dien-1-olate (**2h**).

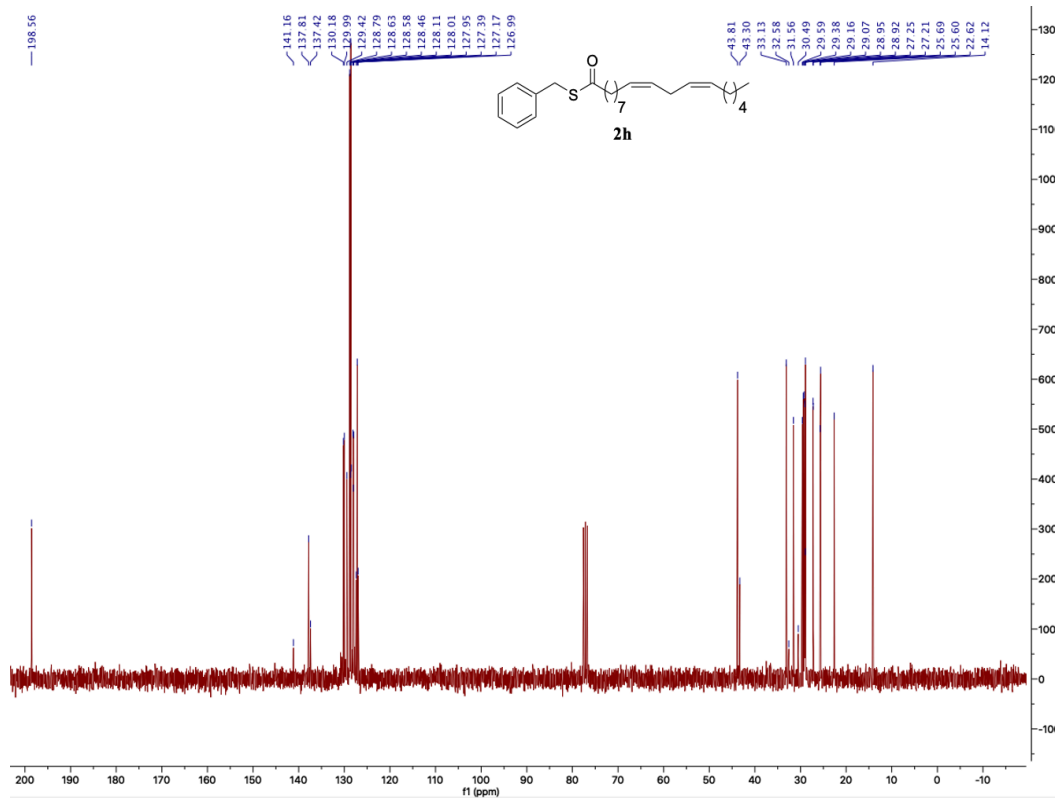

- Figure 34S. <sup>13</sup>C NMR (CDCl<sub>3</sub>, 75 MHz) spectrum of (9Z,12Z)-1-(benzylthio)-octadeca-9,12-dien-1-olate (**2h**).

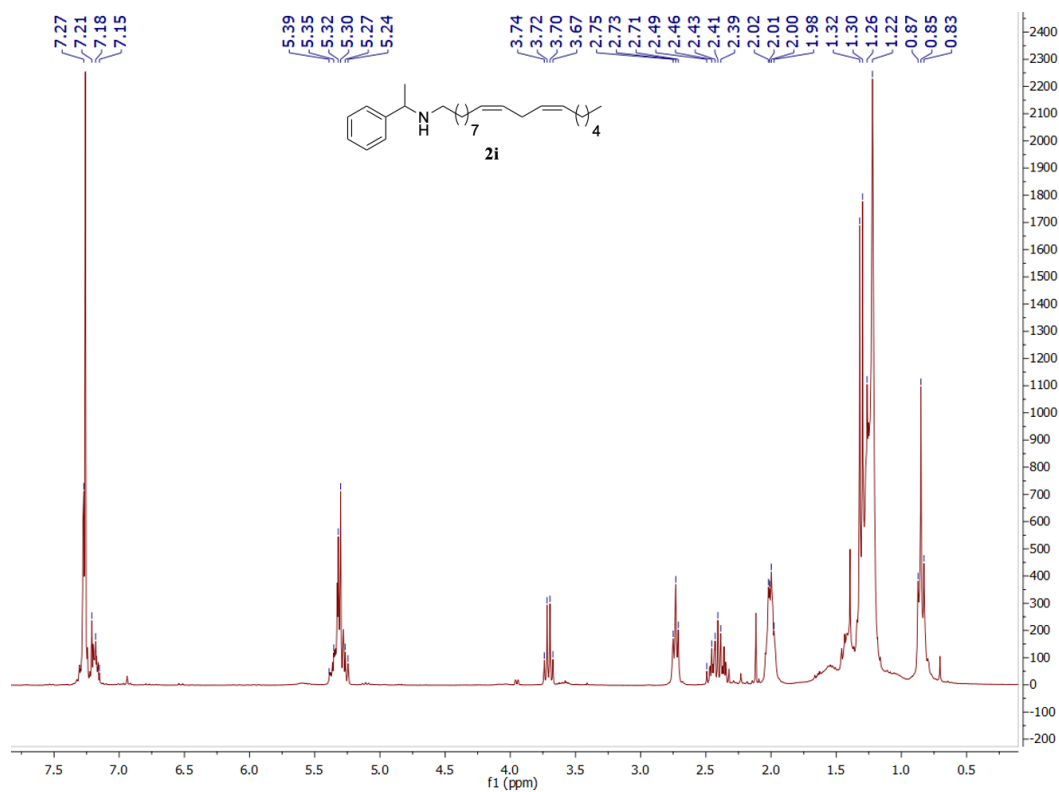

- Figure 35S.  $^1\text{H}$  NMR ( $\text{CDCl}_3$ , 300 MHz) spectrum of (9Z,12Z)-N-(1-phenylethyl)-octadeca-9,12-dien-1-amine (**2i**).

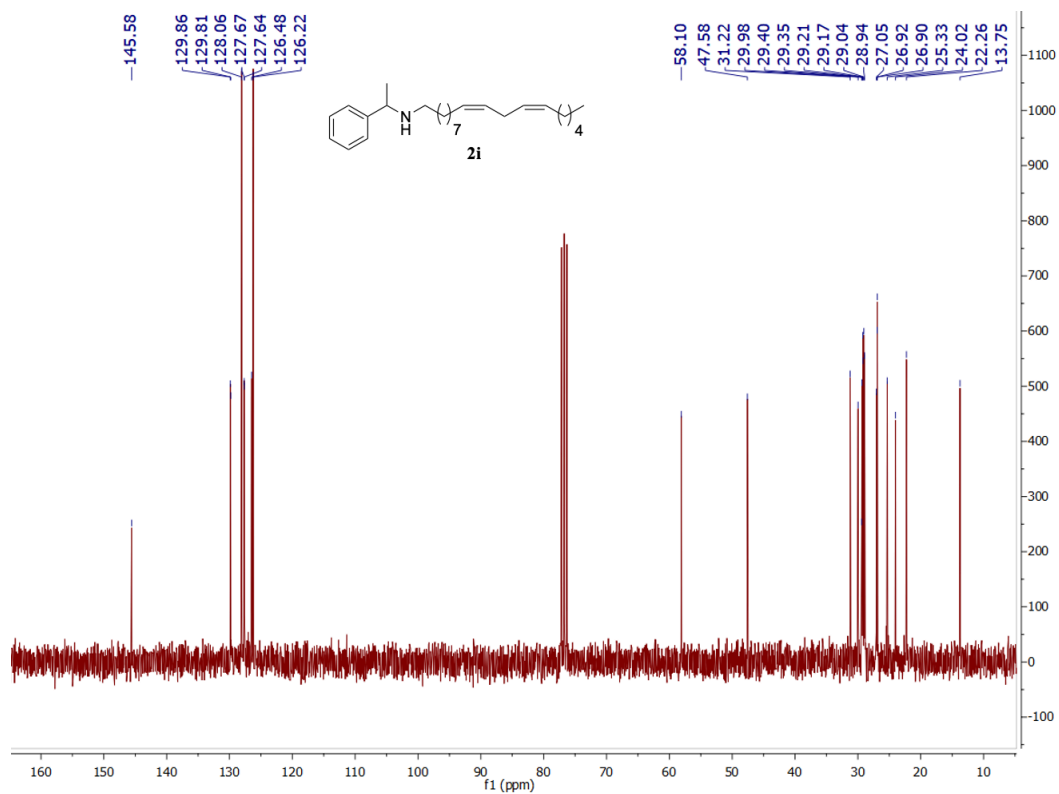

- Figure 36S.  $^{13}\text{C}$  NMR ( $\text{CDCl}_3$ , 75 MHz) spectrum of (9Z,12Z)-N-(1-phenylethyl)-octadeca-9,12-dien-1-amine (**2i**).

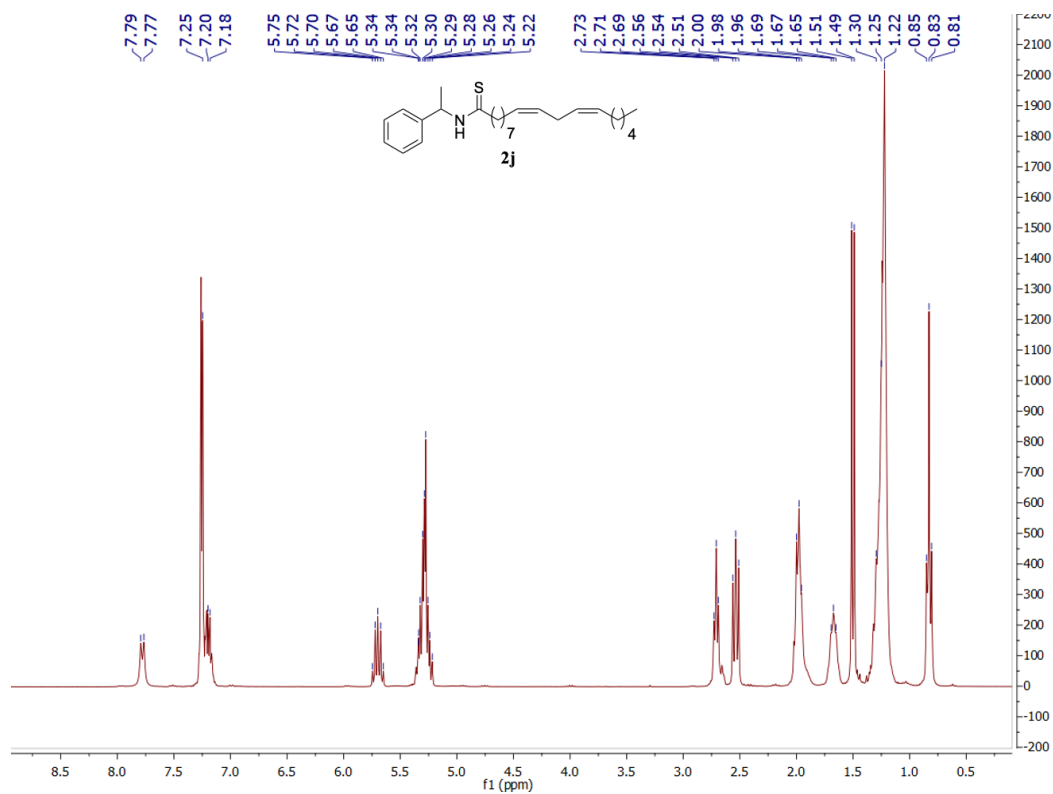

- Figure 37S.  $^1\text{H}$  NMR ( $\text{CDCl}_3$ , 300 MHz) spectrum of (9Z,12Z)-N-(1-phenylethyl)-octadeca-9,12-dienothiamide (**2j**).

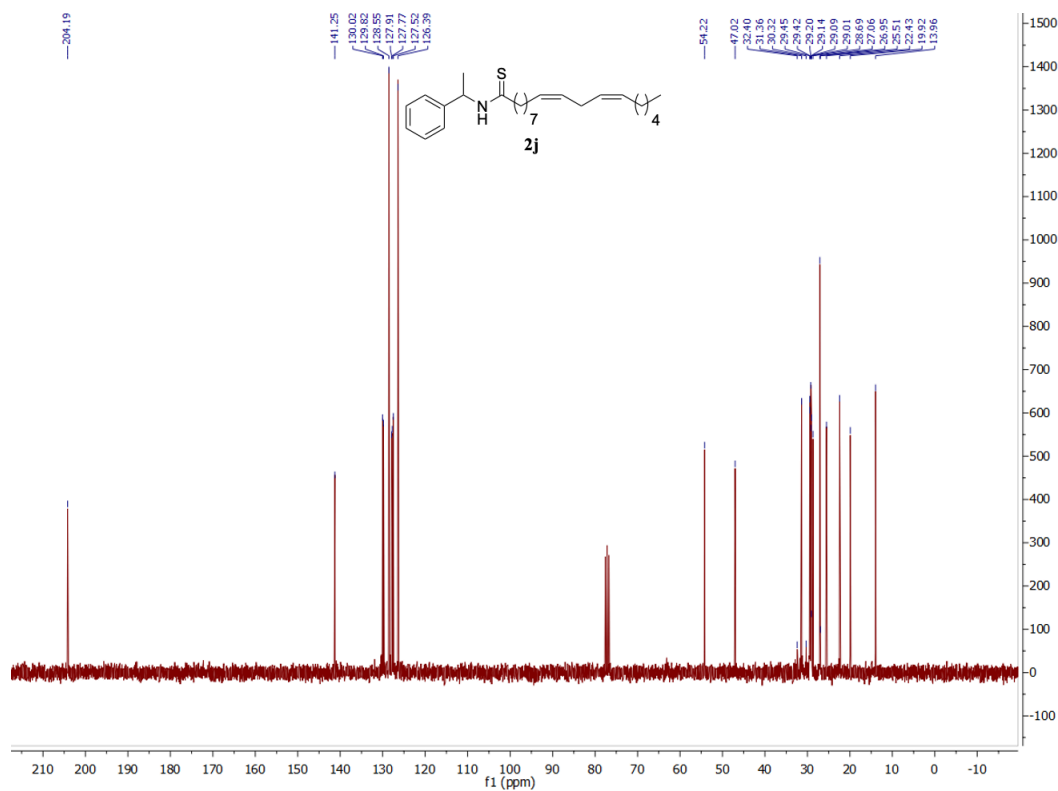

- Figure 38S.  $^{13}\text{C}$  NMR ( $\text{CDCl}_3$ , 75 MHz) spectrum of (9Z,12Z)-N-(1-phenylethyl)-octadeca-9,12-dienothiamide (**2j**).

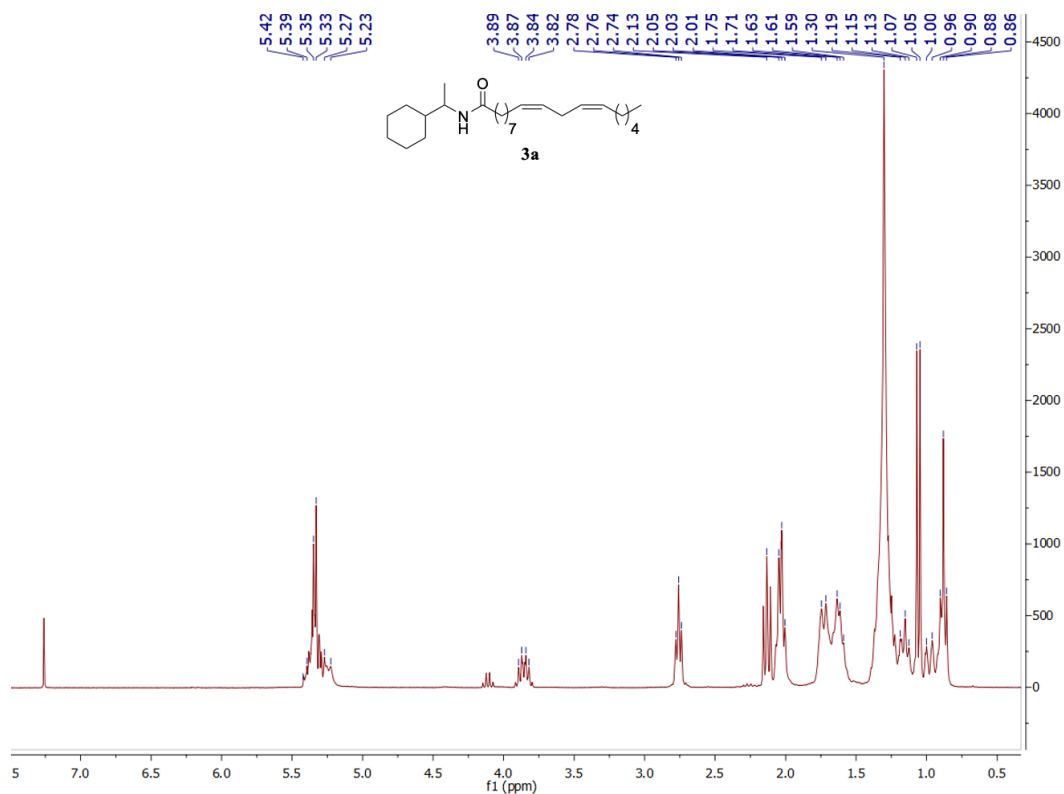

- Figure 39S. <sup>1</sup>H NMR (CDCl<sub>3</sub>, 300 MHz) spectrum of (9Z,12Z)-N-(1-cyclohexylethyl)-octadeca-9,12-dienamide (**3a**).

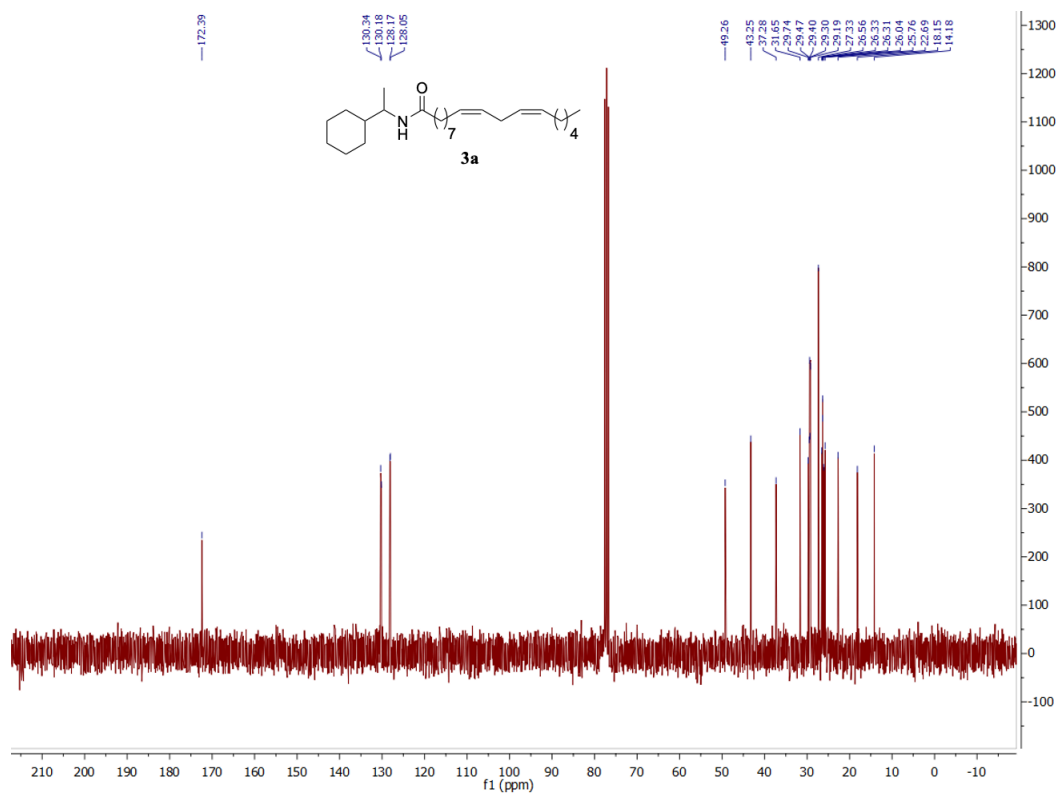

- Figure 40S. <sup>13</sup>C NMR (CDCl<sub>3</sub>, 75 MHz) spectrum of (9Z,12Z)-N-(1-cyclohexylethyl)-octadeca-9,12-dienamide (**3a**).

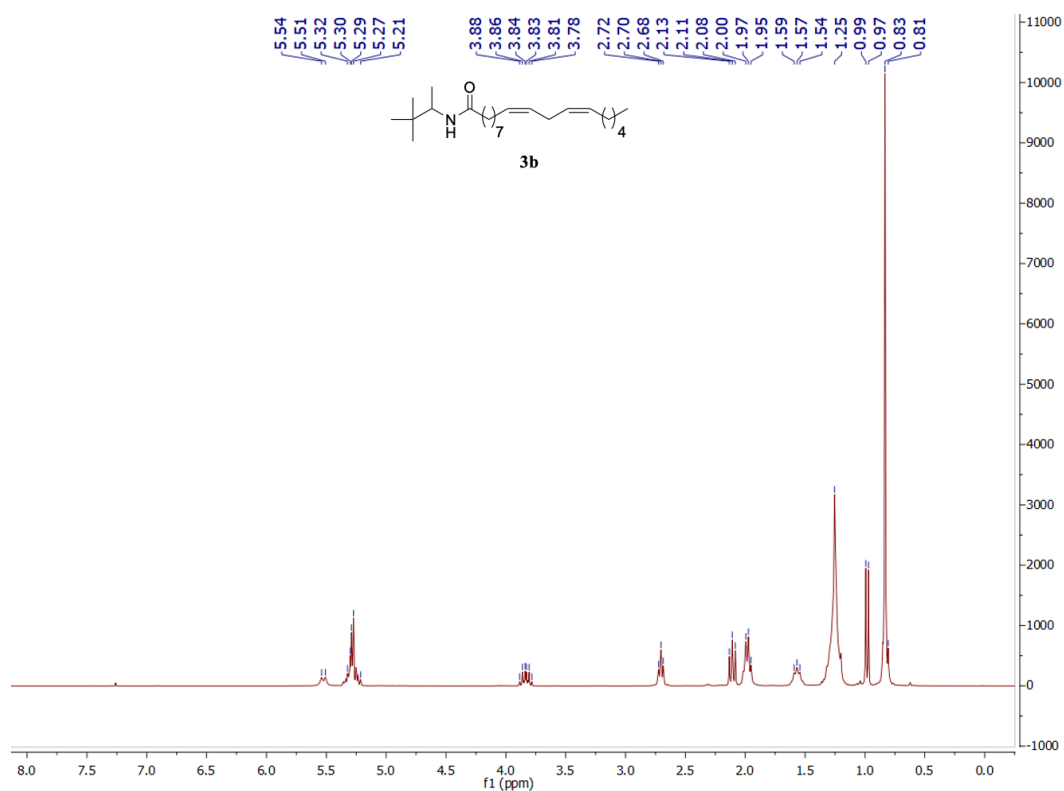

- Figure 41S. <sup>1</sup>H NMR (CDCl<sub>3</sub>, 300 MHz) spectrum of (9Z,12Z)-N-(3,3-dimethylbutan-2-yl)-octadeca-9,12-dienamide (**3b**).

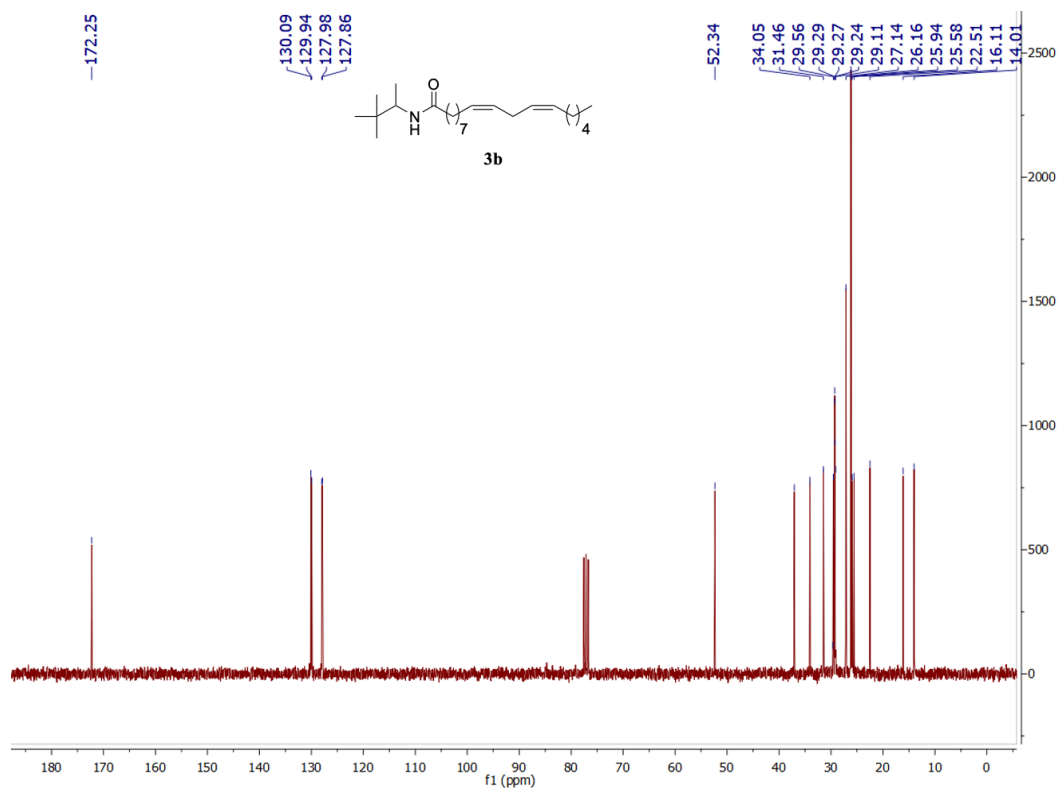

- Figure 42S. <sup>13</sup>C NMR (CDCl<sub>3</sub>, 75 MHz) spectrum of (9Z,12Z)-N-(3,3-dimethylbutan-2-yl)-octadeca-9,12-dienamide (**3b**).



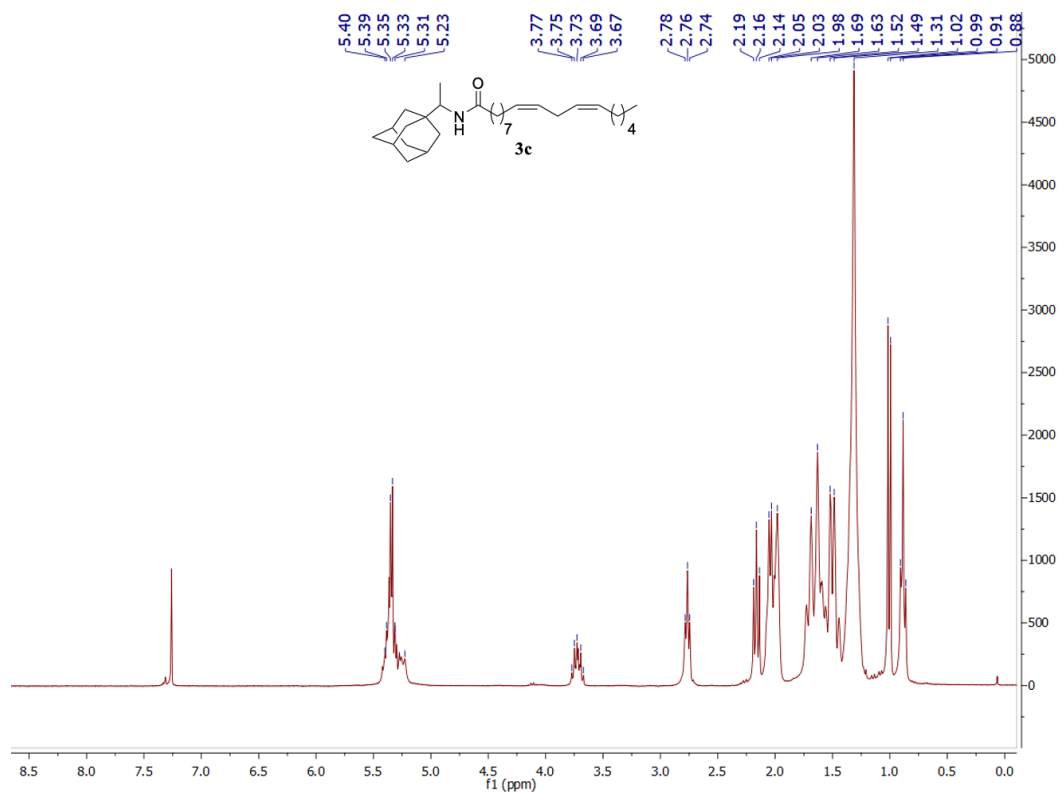

- Figure 43S.  $^1\text{H}$  NMR ( $\text{CDCl}_3$ , 300 MHz) spectrum of (9Z,12Z)-N-(1-((3r,5r,7r)-adamantan-1-yl)-ethyl)-octadeca-9,12-dienamide (**3c**).

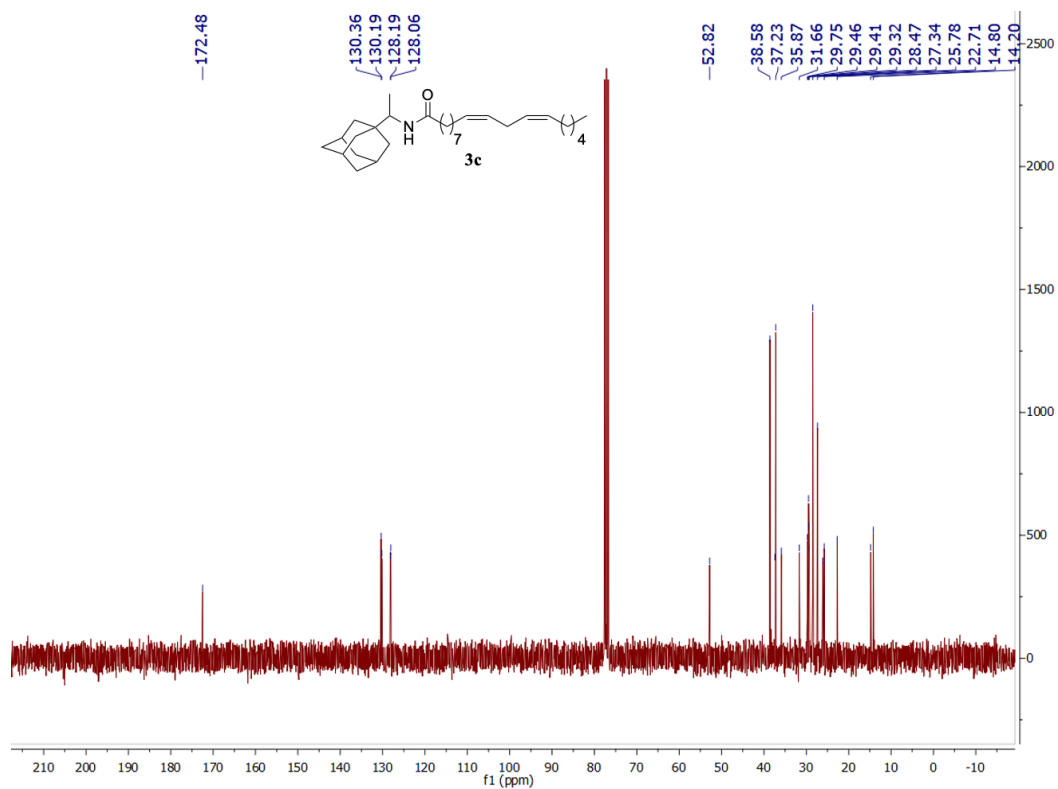

- Figure 44S.  $^{13}\text{C}$  NMR ( $\text{CDCl}_3$ , 75 MHz) spectrum of (9Z,12Z)-N-(1-((3r,5r,7r)-adamantan-1-yl)-ethyl)-octadeca-9,12-dienamide (**3c**).

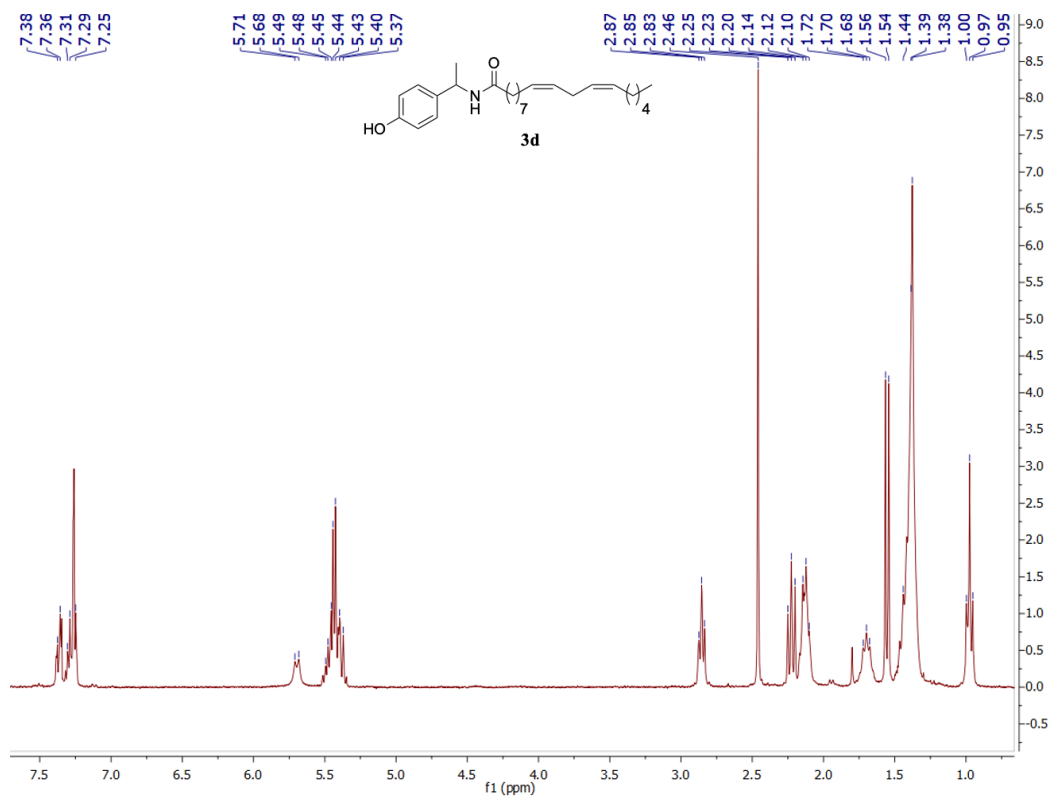

- Figure 45S.  $^1\text{H}$  NMR ( $\text{CDCl}_3$ , 300 MHz) spectrum of (9Z,12Z)-N-(1-(4-hydroxyphenyl)ethyl)-octadeca-9,12-dienamide (**3d**).

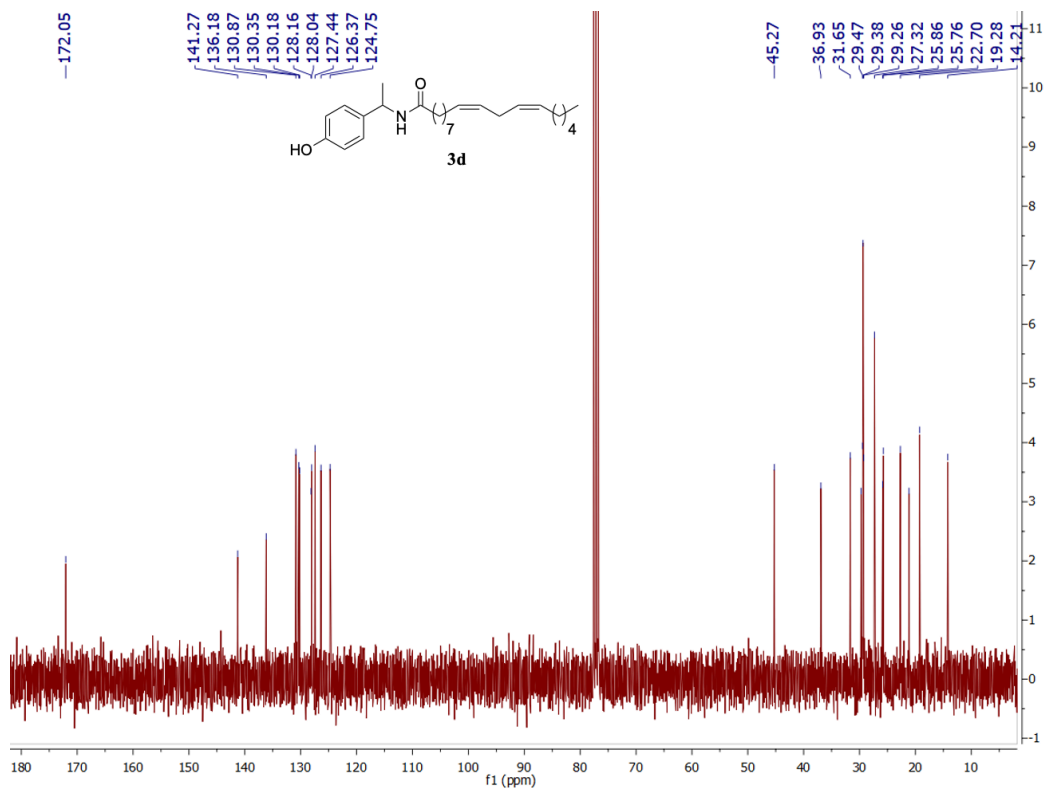

- Figure 46S.  $^{13}\text{C}$  NMR ( $\text{CDCl}_3$ , 75 MHz) spectrum of (9Z,12Z)-N-(1-(4-hydroxyphenyl)ethyl)-octadeca-9,12-dienamide (**3d**).

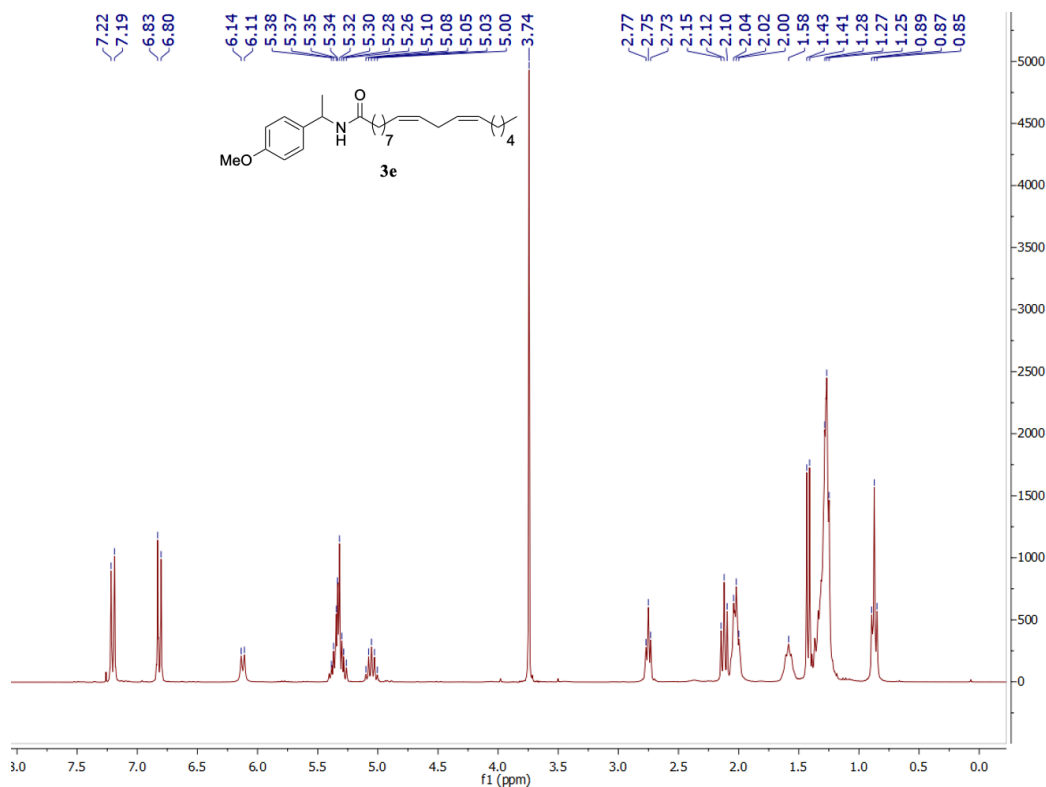

- Figure 47S.  $^1\text{H}$  NMR ( $\text{CDCl}_3$ , 300 MHz) spectrum of (9Z,12Z)-N-(1-(4-methoxyphenyl)-ethyl)-octadeca-9,12-dienamide (**3e**).

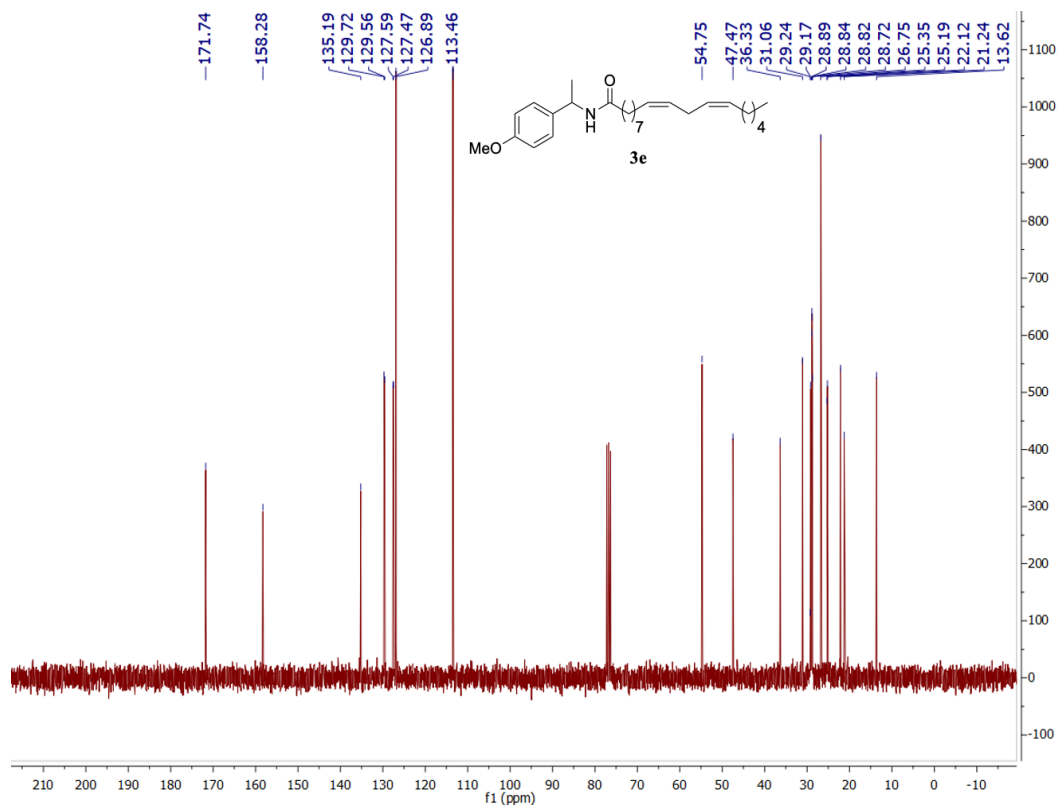

- Figure 48S.  $^{13}\text{C}$  NMR ( $\text{CDCl}_3$ , 75 MHz) spectrum of (9Z,12Z)-N-(1-(4-methoxyphenyl)-ethyl)-octadeca-9,12-dienamide (**3e**).

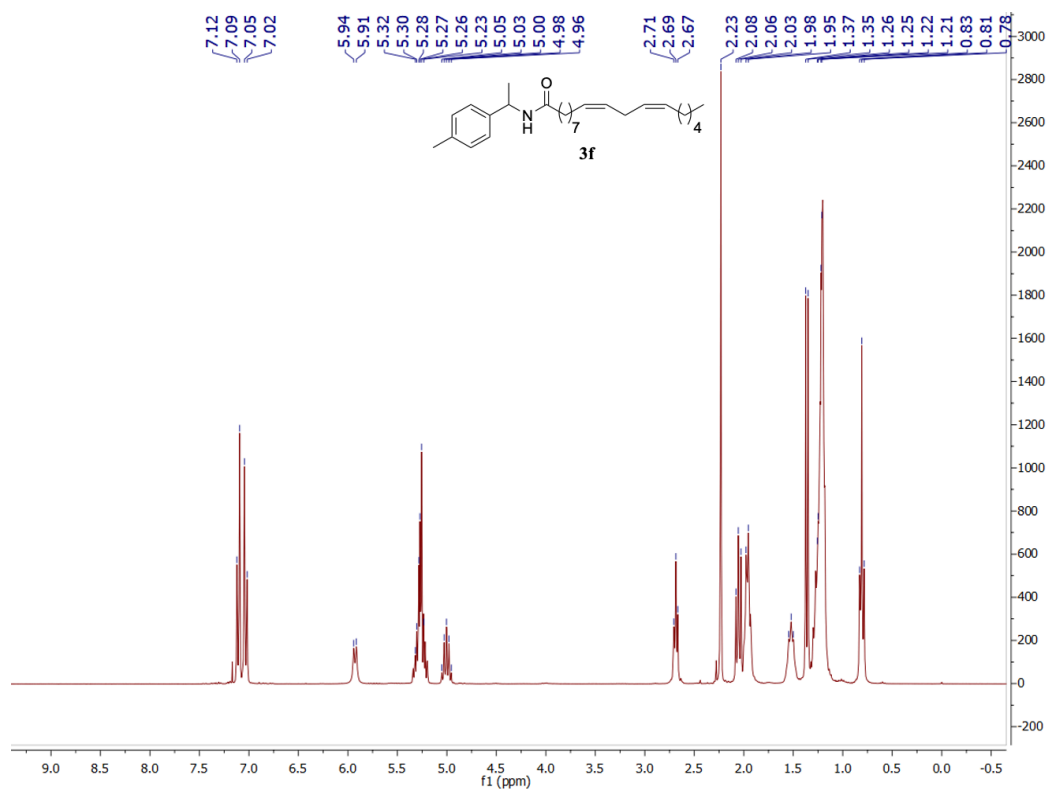

- Figure 49S. <sup>1</sup>H NMR (CDCl<sub>3</sub>, 300 MHz) spectrum of (9Z,12Z)-N-(1-(p-tolyl)-ethyl)-octadeca-9,12-dienamide (**3f**).

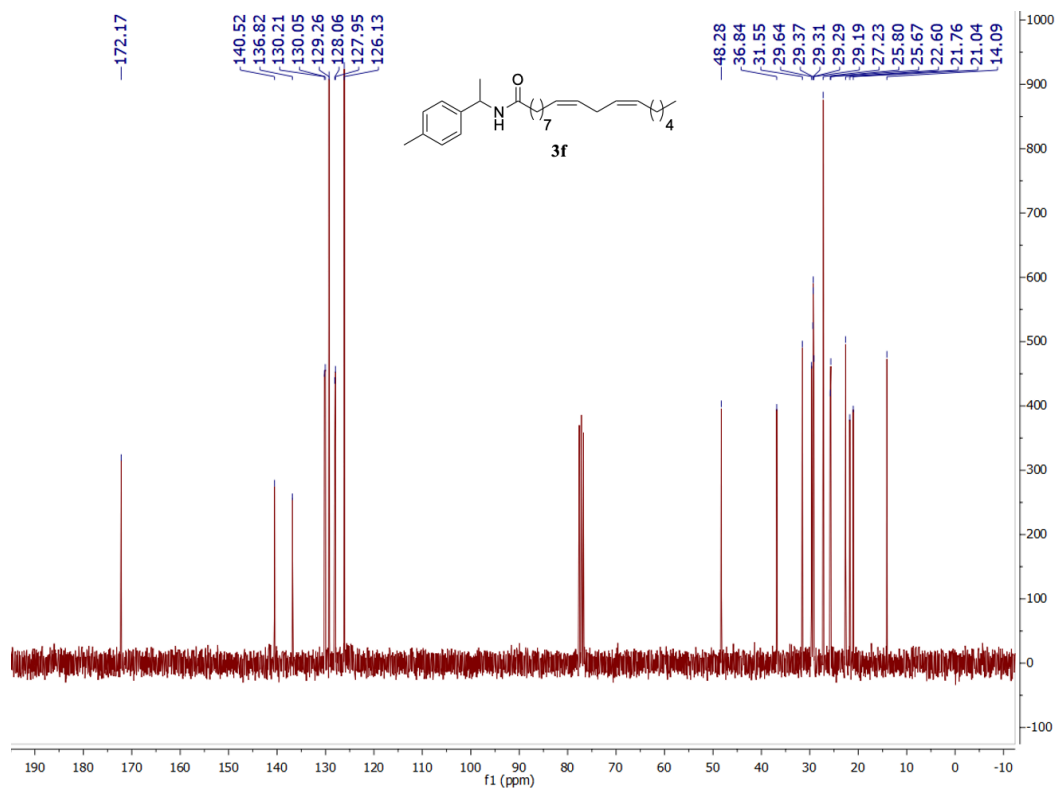

- Figure 50S. <sup>13</sup>C NMR (CDCl<sub>3</sub>, 75 MHz) spectrum of (9Z,12Z)-N-(1-(p-tolyl)-ethyl)-octadeca-9,12-dienamide (**3f**).

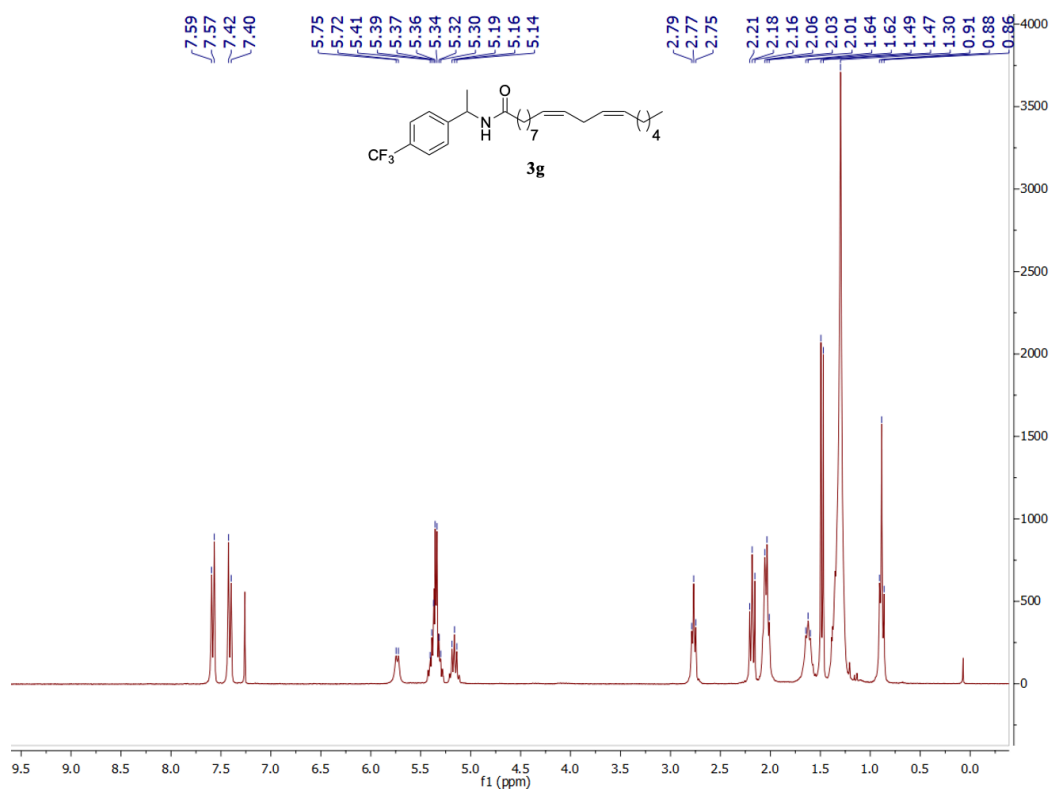

- Figure 51S. <sup>1</sup>H NMR (CDCl<sub>3</sub>, 300 MHz) spectrum of (9Z,12Z)-N-(1-(4-(trifluoromethyl)-phenyl)-ethyl)-octadeca-9,12-dienamide (**3g**).

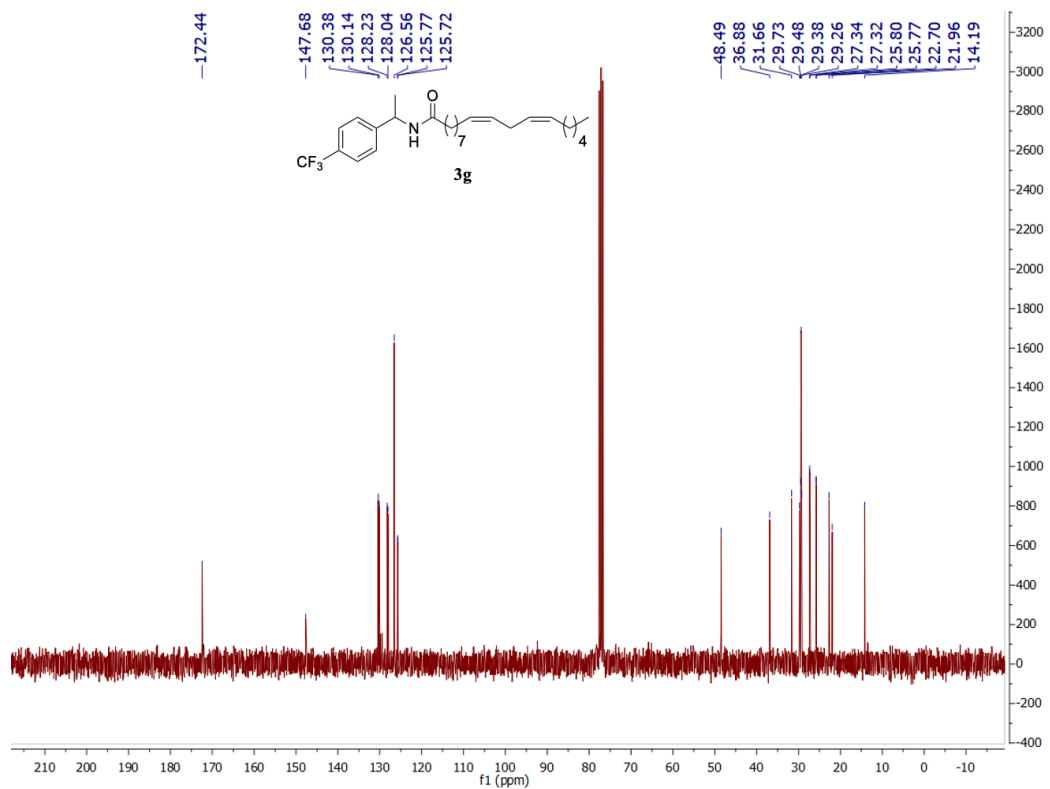

- Figure 52S. <sup>13</sup>C NMR (CDCl<sub>3</sub>, 75 MHz) spectrum of (9Z,12Z)-N-(1-(4-(trifluoromethyl)-phenyl)-ethyl)-octadeca-9,12-dienamide (**3g**).

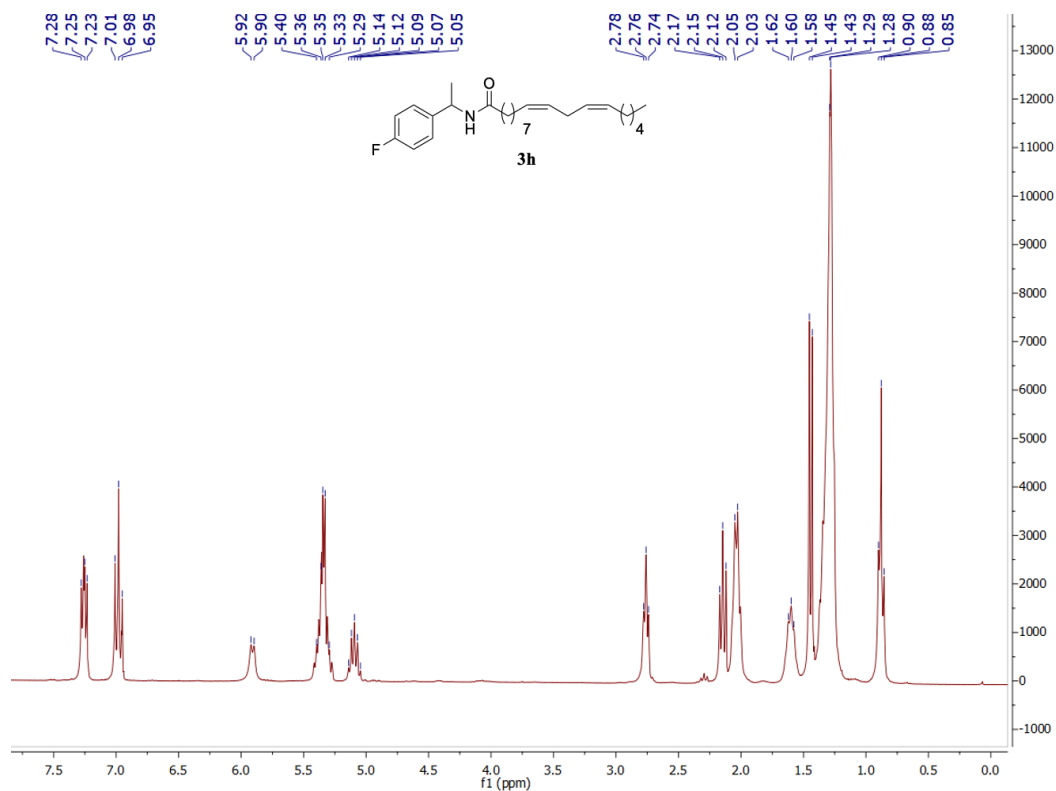

- Figure 53S. <sup>1</sup>H NMR (CDCl<sub>3</sub>, 300 MHz) spectrum of (9Z,12Z)-N-(1-(4-fluorophenyl)ethyl)-octadeca-9,12-dienamide (**3h**).

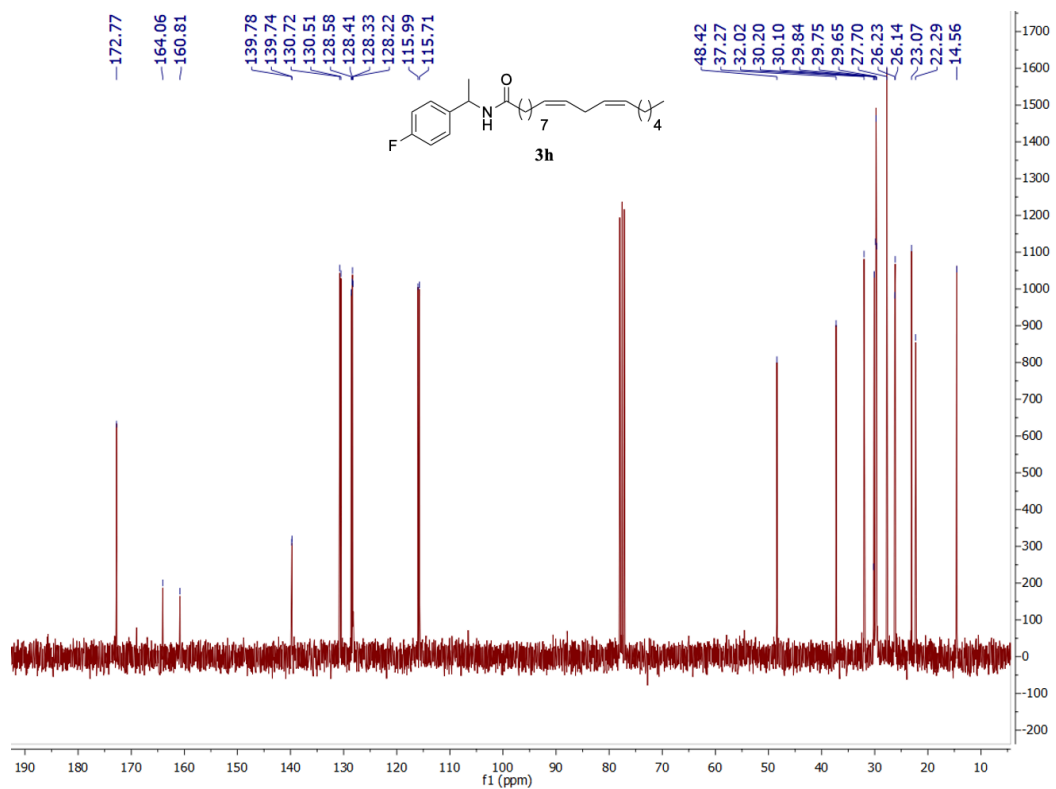

- Figure 54S. <sup>13</sup>C NMR (CDCl<sub>3</sub>, 75 MHz) spectrum of (9Z,12Z)-N-(1-(4-fluorophenyl)ethyl)-octadeca-9,12-dienamide (**3h**).

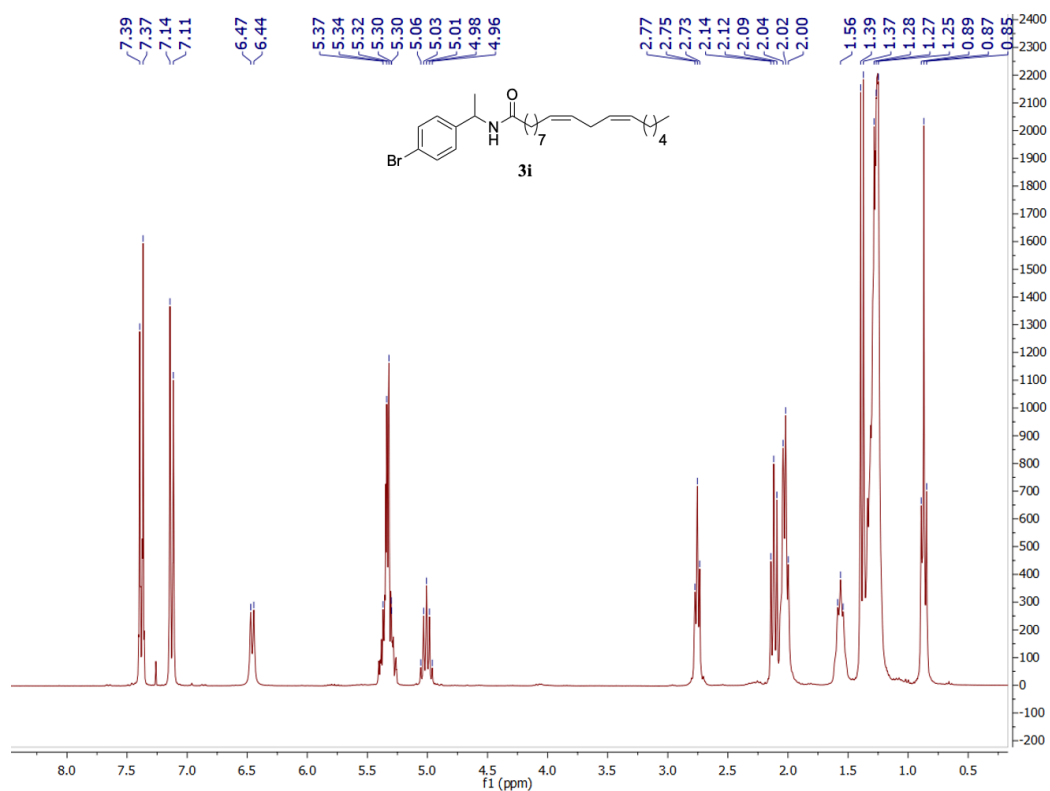

- Figure 55S. <sup>1</sup>H NMR (CDCl<sub>3</sub>, 300 MHz) spectrum of (9Z,12Z)-N-(1-(4-bromophenyl)-ethyl)-octadeca-9,12-dienamide (**3i**).

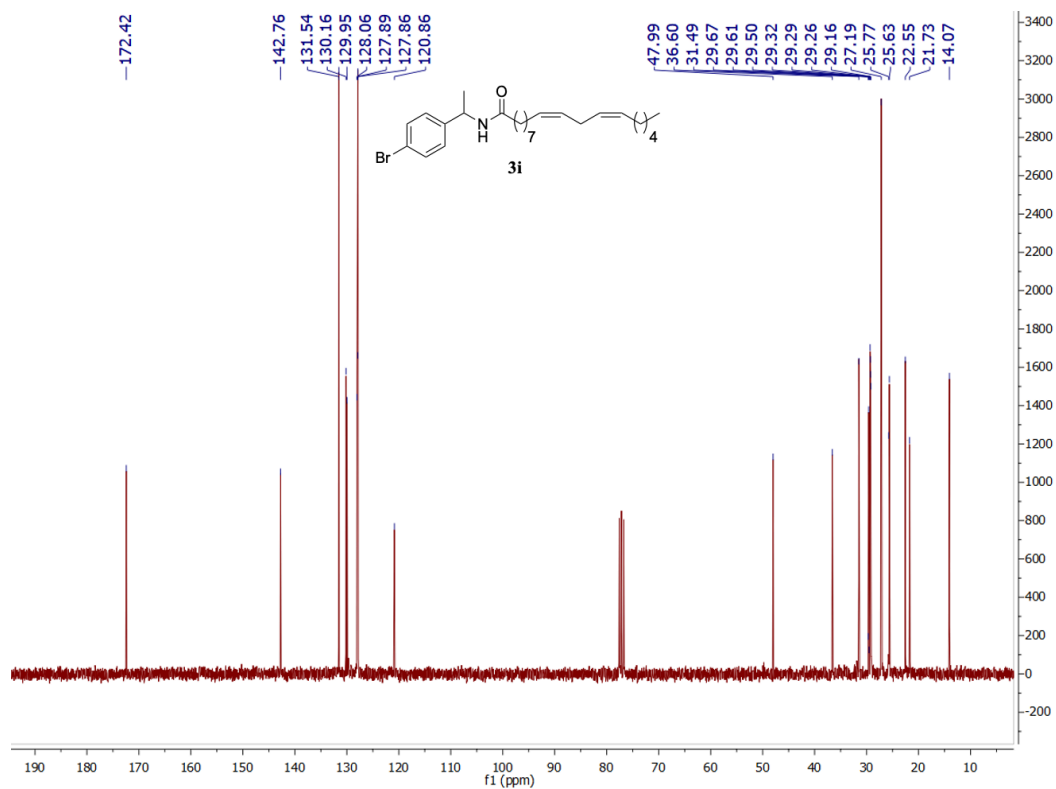

- Figure 56S. <sup>13</sup>C NMR (CDCl<sub>3</sub>, 75 MHz) spectrum of (9Z,12Z)-N-(1-(4-bromophenyl)-ethyl)-octadeca-9,12-dienamide (**3i**).

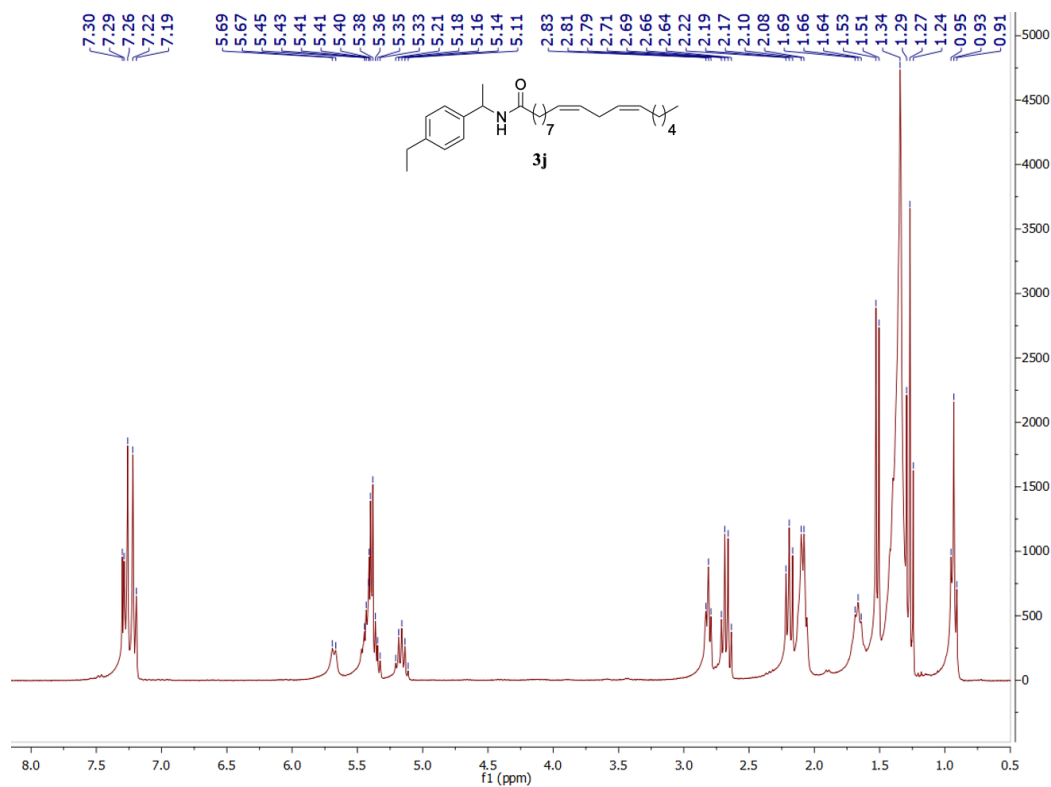

- Figure 57S. <sup>1</sup>H NMR (CDCl<sub>3</sub>, 300 MHz) spectrum of (9Z,12Z)-N-(1-(4-ethylphenyl)-ethyl)-octadeca-9,12-dienamide (**3j**).

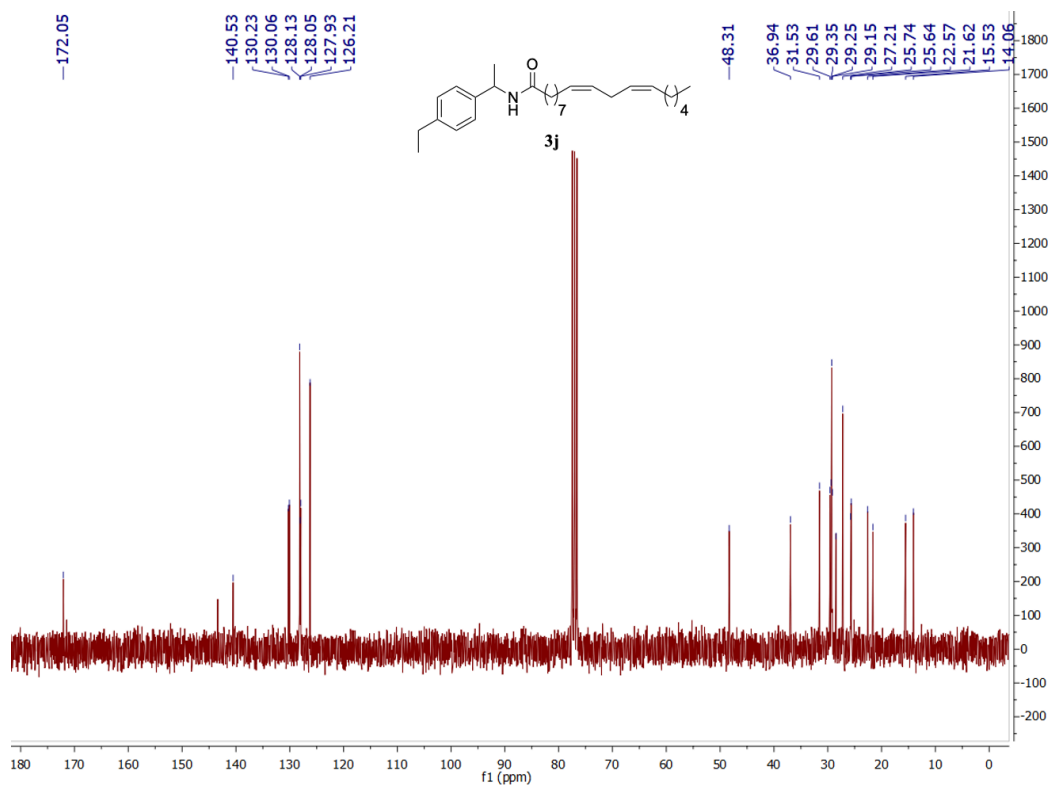

- Figure 58S. <sup>13</sup>C NMR (CDCl<sub>3</sub>, 75 MHz) spectrum of (9Z,12Z)-N-(1-(4-ethylphenyl)-ethyl)-octadeca-9,12-dienamide (**3j**).



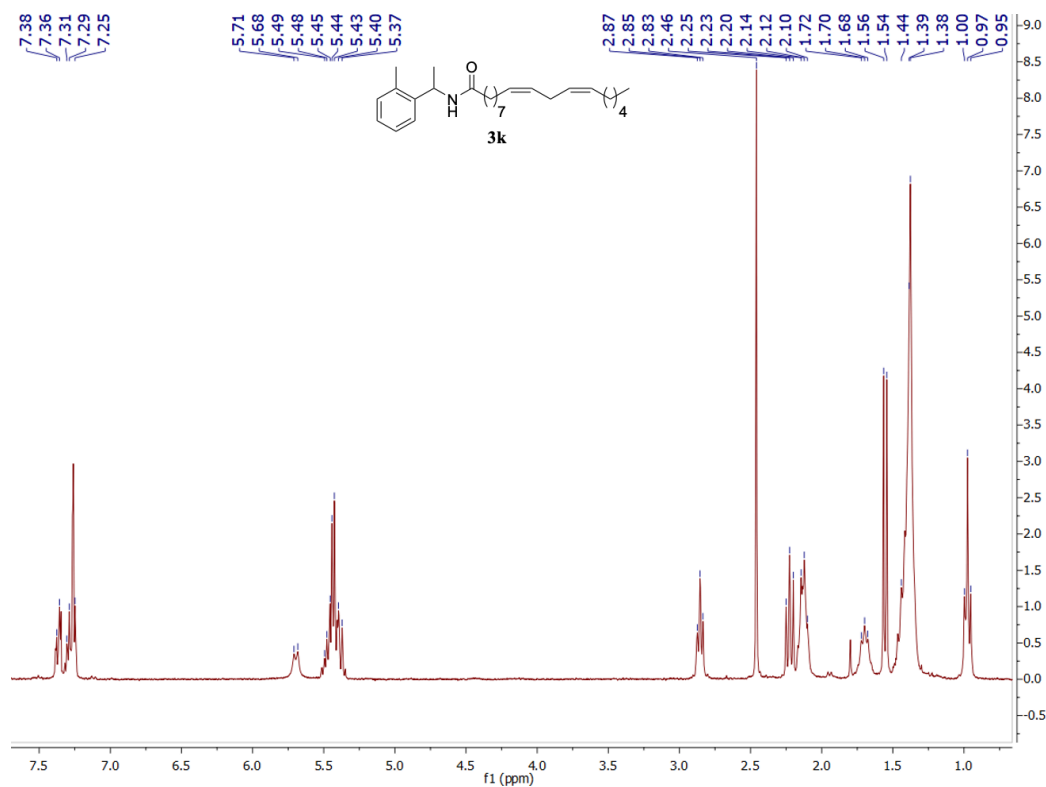

- Figure 59S. <sup>1</sup>H NMR (CDCl<sub>3</sub>, 300 MHz) spectrum of (9Z,12Z)-N-(1-(o-tolyl)-ethyl)-octadeca-9,12-dienamide (**3k**).

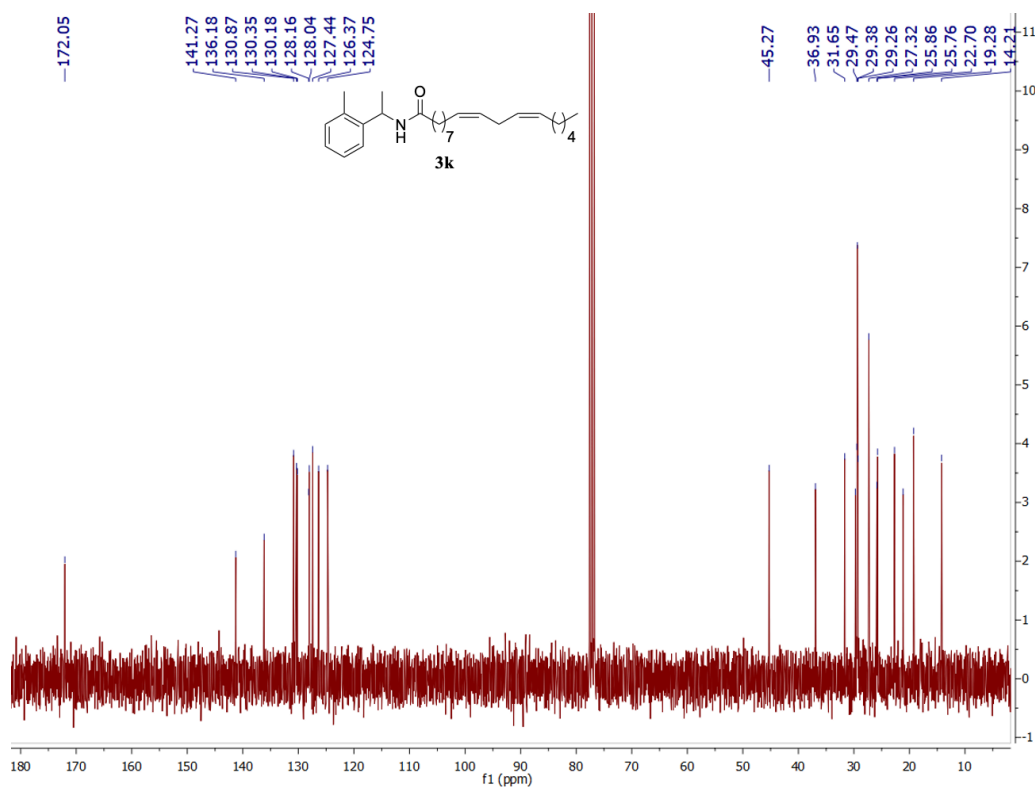

- Figure 60S. <sup>13</sup>C NMR (CDCl<sub>3</sub>, 75 MHz) spectrum of (9Z,12Z)-N-(1-(o-tolyl)-ethyl)-octadeca-9,12-dienamide (**3k**).

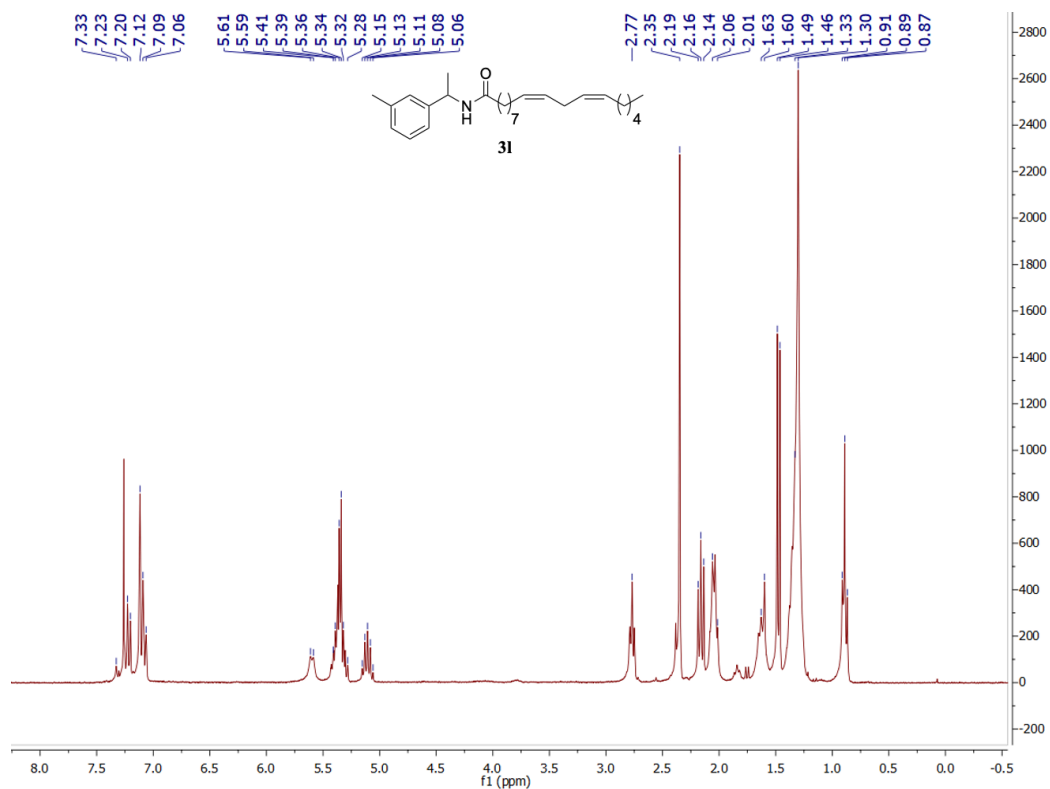

- Figure 61S. <sup>1</sup>H NMR (CDCl<sub>3</sub>, 300 MHz) spectrum of (9Z,12Z)-N-(1-(*m*-tolyl)-ethyl)-octadeca-9,12-dienamide (**31**).

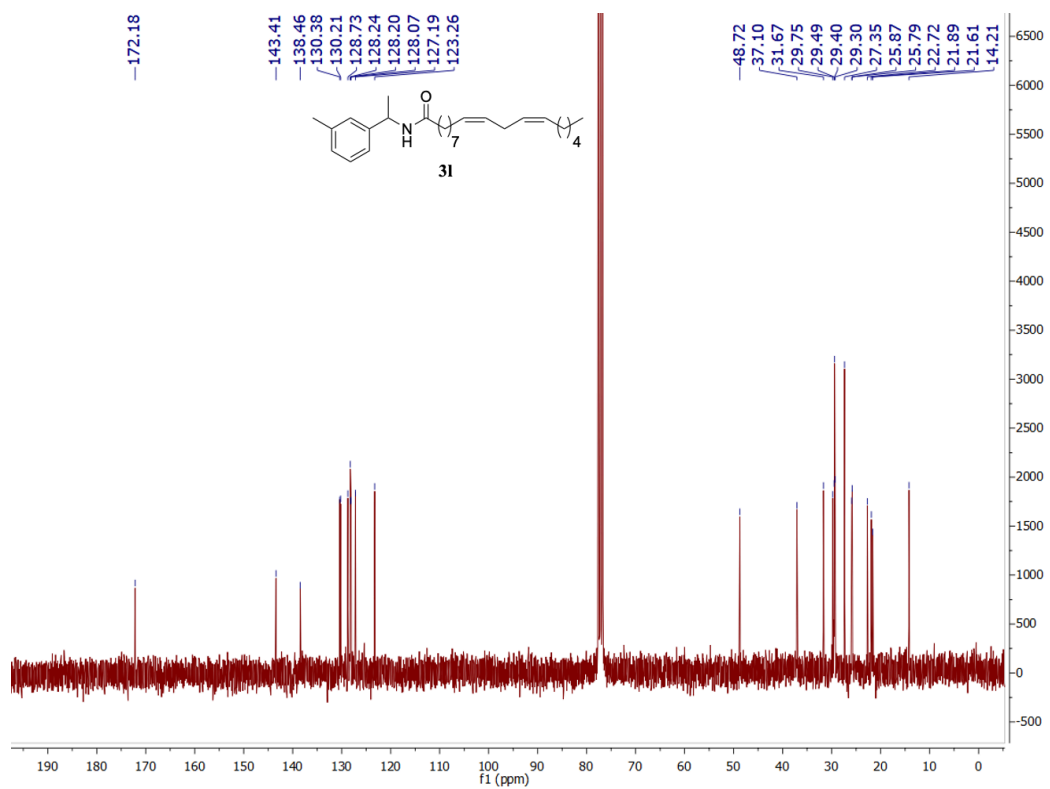

- Figure 62S. <sup>13</sup>C NMR (CDCl<sub>3</sub>, 75 MHz) spectrum of (9Z,12Z)-N-(1-(*m*-tolyl)-ethyl)-octadeca-9,12-dienamide (**31**).

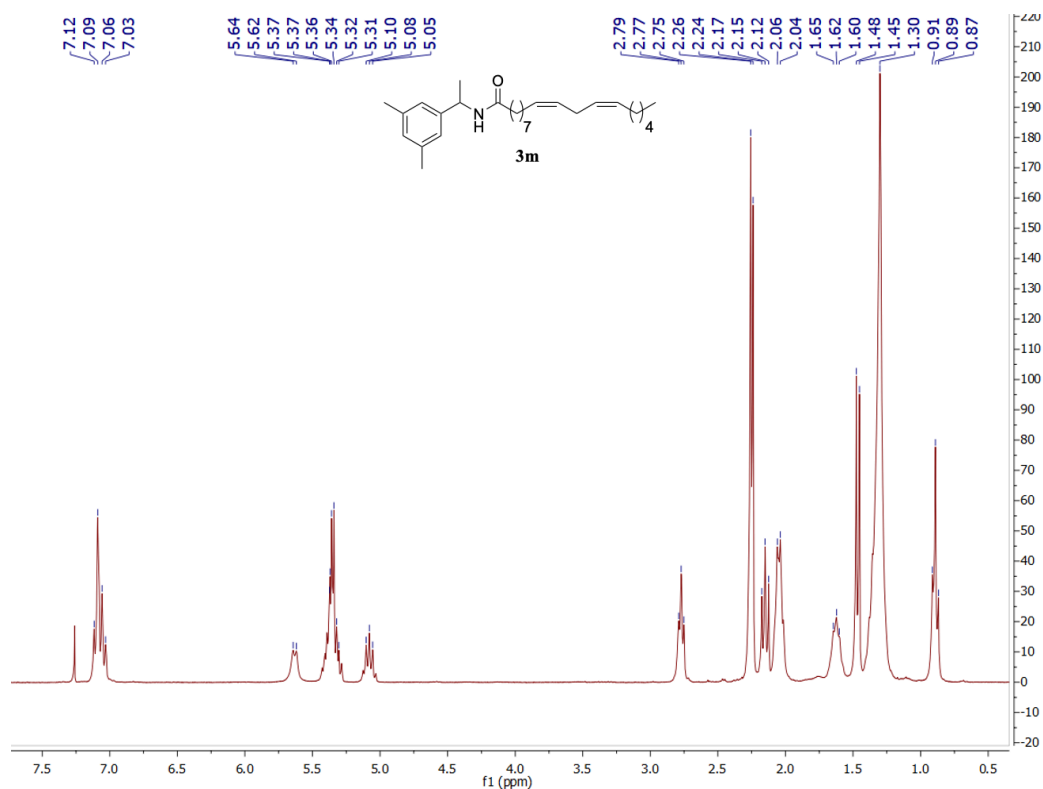

- Figure 63S. <sup>1</sup>H NMR (CDCl<sub>3</sub>, 300 MHz) spectrum of (9Z,12Z)-N-(1-(3,5-dimethylphenyl)-ethyl)-octadeca-9,12-dienamide (**3m**).

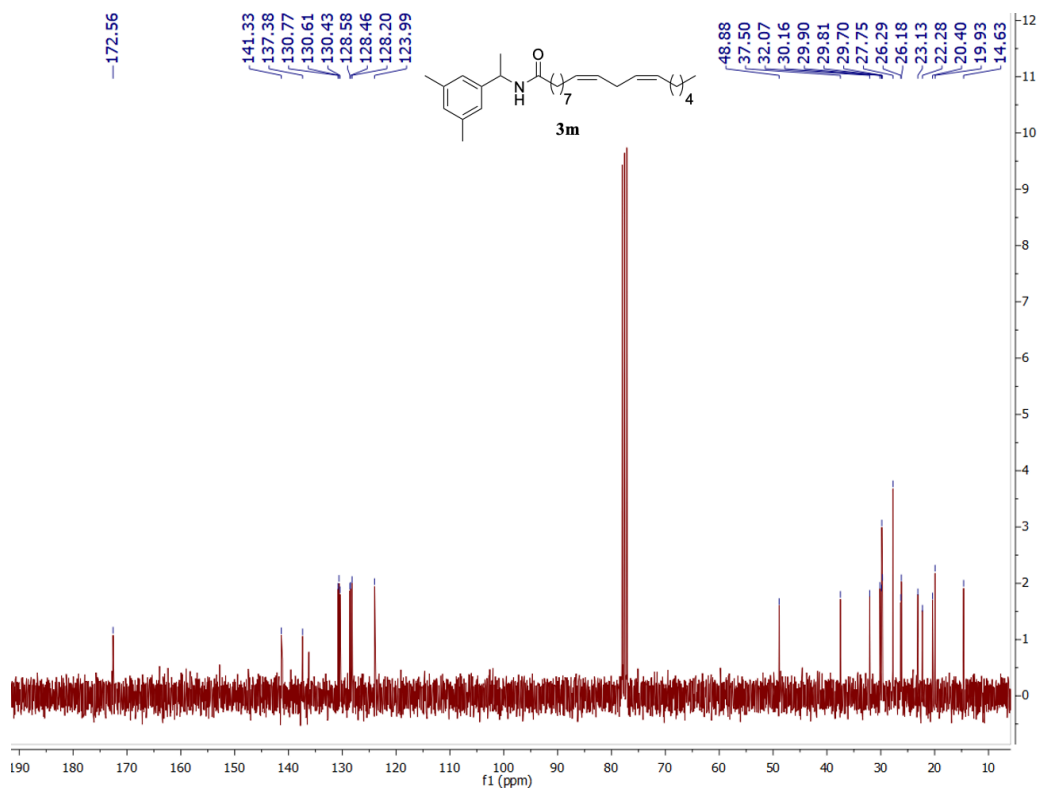

- Figure 64S. <sup>13</sup>C NMR (CDCl<sub>3</sub>, 75 MHz) spectrum of (9Z,12Z)-N-(1-(3,5-dimethylphenyl)-ethyl)-octadeca-9,12-dienamide (**3m**).

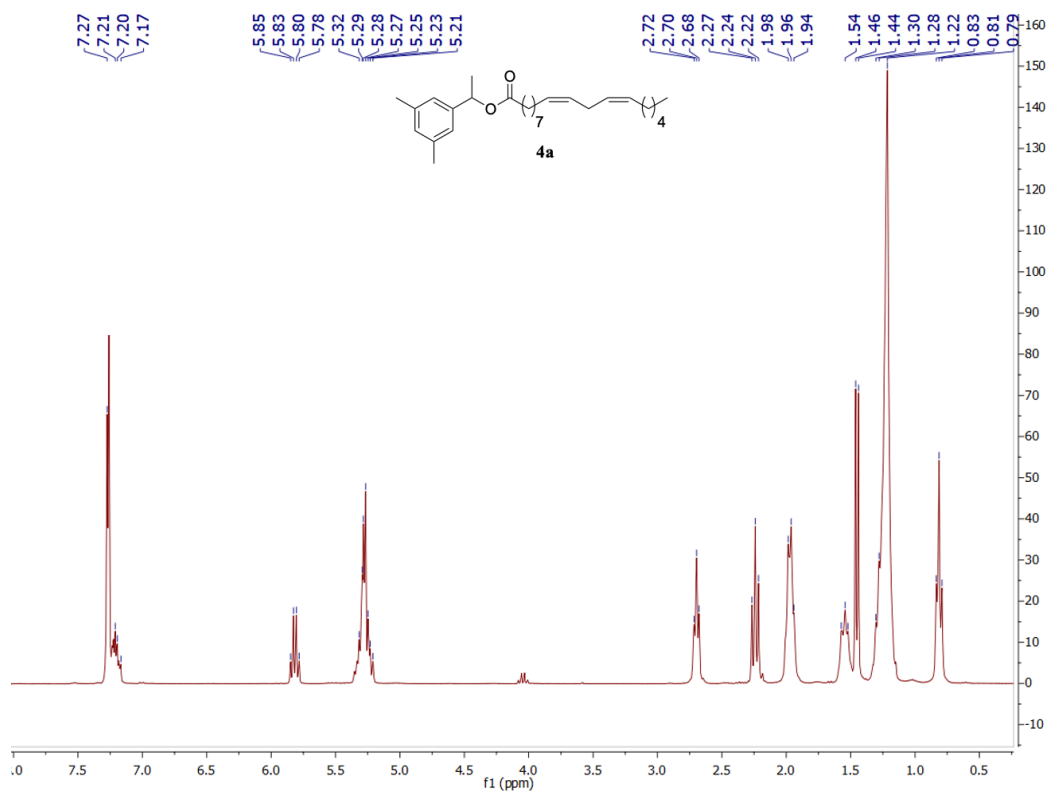

- Figure 65S. <sup>1</sup>H NMR (CDCl<sub>3</sub>, 300 MHz) spectrum of (9Z,12Z)-1-(1-(3,5-dimethylphenyl)ethoxy)-octadeca-9,12-dien-1-olate (**4a**).

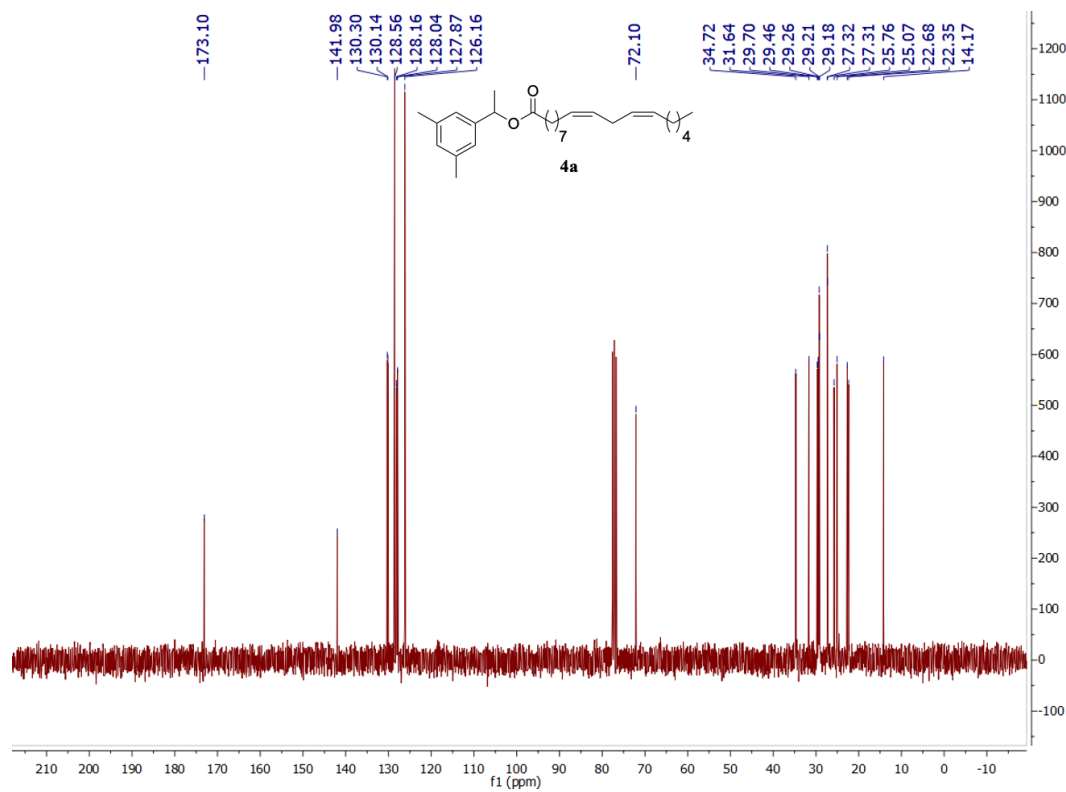

- Figure 66S. <sup>13</sup>C NMR (CDCl<sub>3</sub>, 75 MHz) spectrum of (9Z,12Z)-1-(1-(3,5-dimethylphenyl)ethoxy)-octadeca-9,12-dien-1-olate (**4a**).

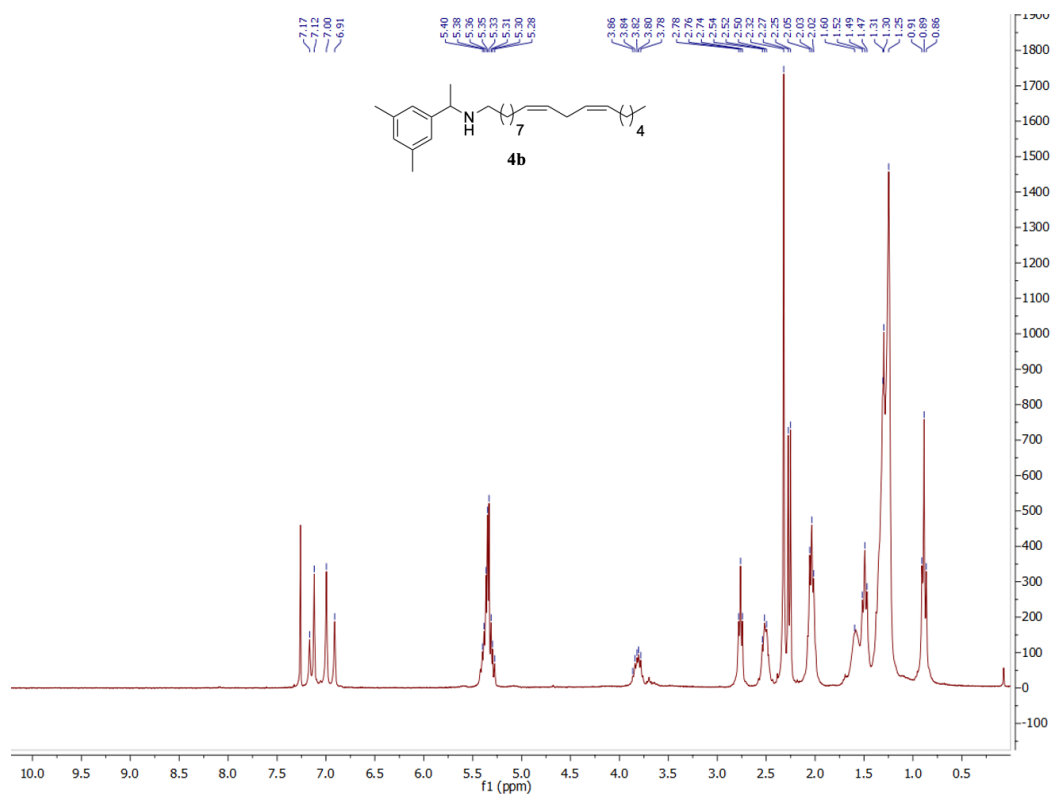

- Figure 67S. <sup>1</sup>H NMR (CDCl<sub>3</sub>, 300 MHz) spectrum of (9Z,12Z)-N-(1-(3,5-dimethylphenyl)ethyl)-octadeca-9,12-dien-1-amine (**4b**).

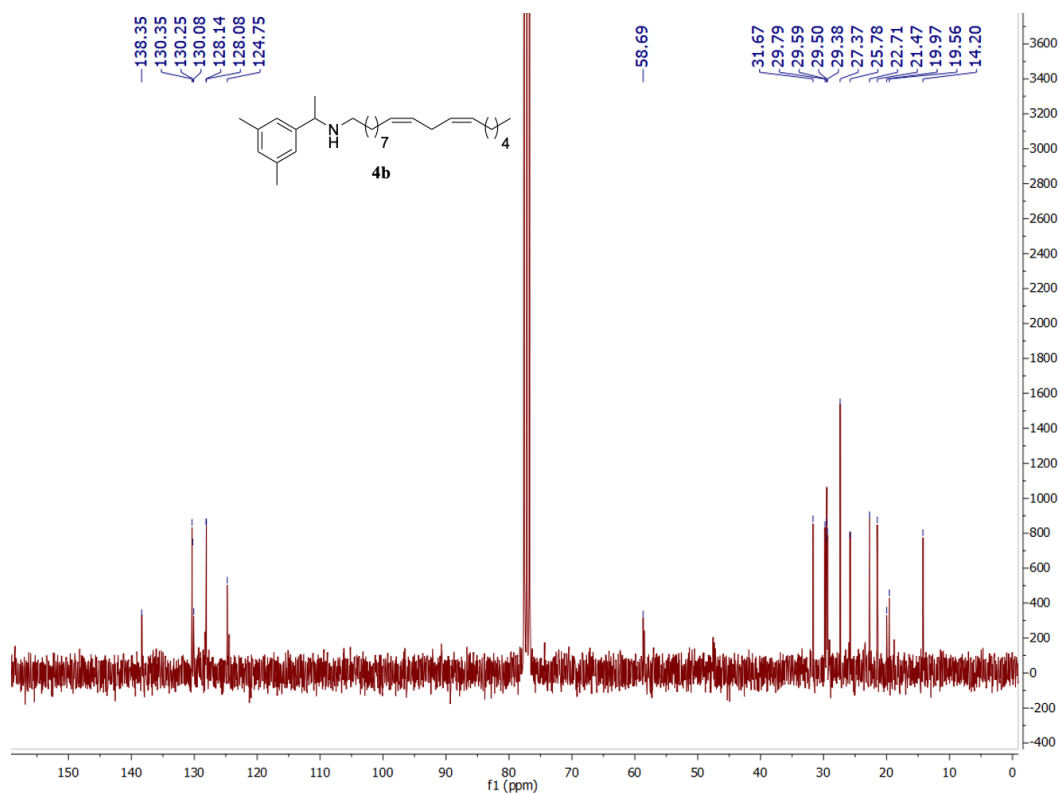

- Figure 68S. <sup>13</sup>C NMR (CDCl<sub>3</sub>, 75 MHz) spectrum of (9Z,12Z)-N-(1-(3,5-dimethylphenyl)ethyl)-octadeca-9,12-dien-1-amine (**4b**).

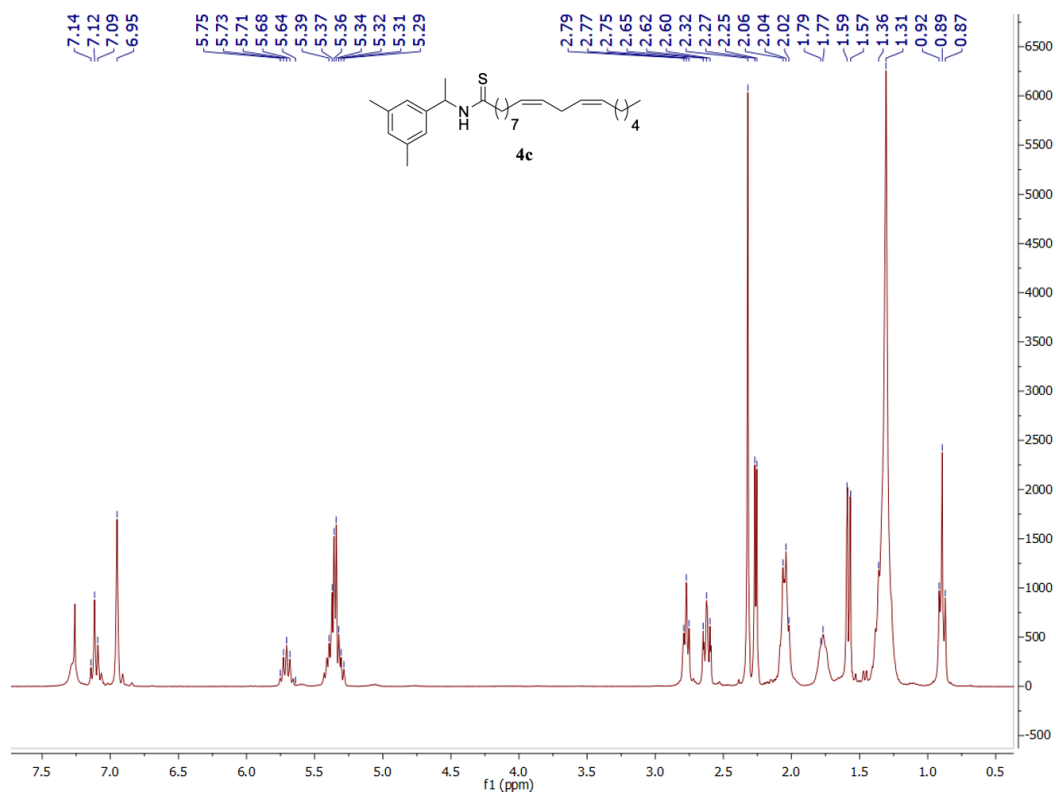

- Figure 69S. <sup>1</sup>H NMR (CDCl<sub>3</sub>, 300 MHz) spectrum of *(9Z,12Z)-N*-(1-(3,5-dimethylphenyl)ethyl)-octadeca-9,12-dienethioamide (**4c**).

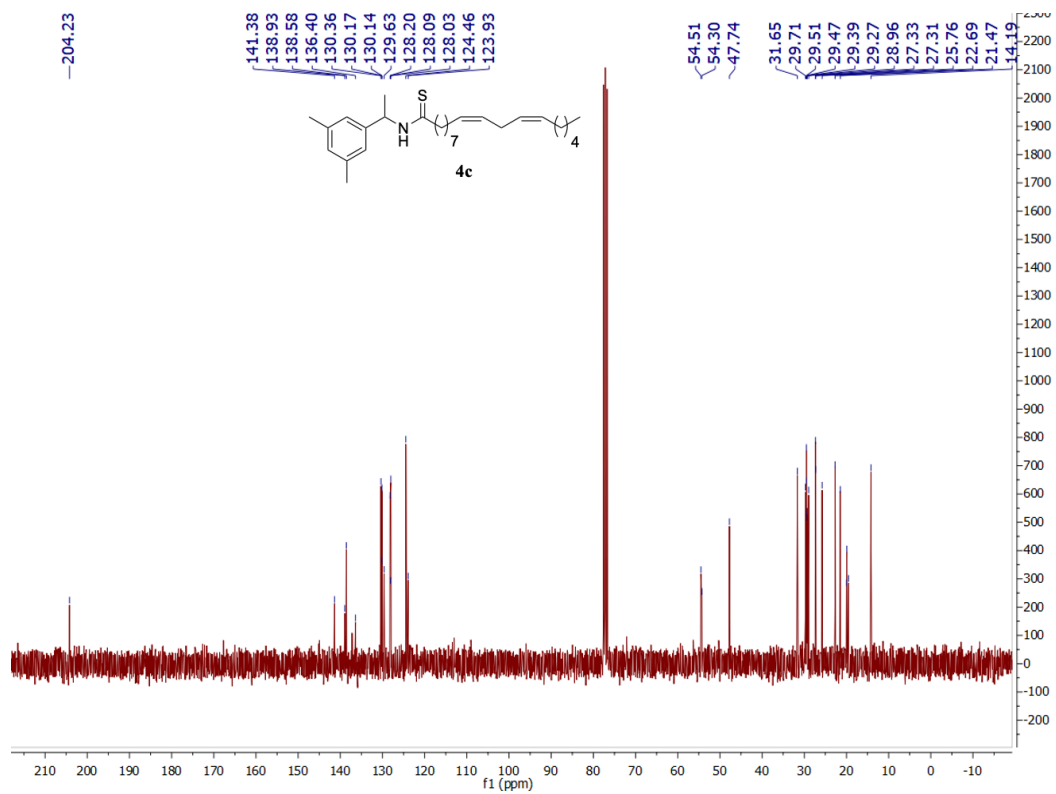

- Figure 70S. <sup>13</sup>C NMR (CDCl<sub>3</sub>, 75 MHz) spectrum of *(9Z,12Z)-N*-(1-(3,5-dimethylphenyl)ethyl)-octadeca-9,12-dienethioamide (**4c**).
